1           **Toxic stress-specific cytoprotective responses regulate learned behavioral decisions**  
2                                                           **in *C. elegans***

3

4

5                           Gábor Hajdú, Eszter Gecse, István Taisz<sup>#</sup>, István Móra & Csaba Sóti\*

6

7                           *Department of Medical Chemistry, Semmelweis University, Budapest, Hungary*

8                           <sup>#</sup>*Current address: MRC Laboratory of Molecular Biology, Neurobiology Division,*

9                                                           *Cambridge, UK*

10

11

12   **\*Corresponding author.** Department of Medical Chemistry, Semmelweis University,  
13   P.O.Box 2, Budapest, H-1428, Hungary. Tel.: + 36 1 4591500 extn. 60130; Fax: + 36 1 4591500  
14   extn. 60141; E-mail: [soti.csaba@med.semmelweis-univ.hu](mailto:soti.csaba@med.semmelweis-univ.hu)

15

16   **Keywords:** cellular defense, behavioral decision, aversion, associative memory, stress and  
17   detoxification responses

18

## 19 **Abstract**

## 20 **Background**

21 Protection of organismal integrity involve physiological stress responses and behavioral  
22 defenses. Recent studies in the roundworm *Caenorhabditis elegans* have shown that pathogen  
23 and toxin exposure simultaneously stimulate cellular stress and detoxification responses and  
24 aversive behavior. However, whether a coordinate regulation exists between cellular and  
25 neurobehavioral defenses remains unclear.

## 26 **Results**

27 Here we show that exposure of *C. elegans* to high concentrations of naturally attractive food-  
28 derived odors, benzaldehyde and diacetyl, induces toxicity and aversive behavior.  
29 Benzaldehyde preconditioning activates systemic cytoprotective stress responses involving  
30 DAF-16/FOXO, SKN-1/Nrf and Hsp90 in somatic cells, which confer behavioral tolerance to  
31 benzaldehyde and cross-tolerance to the structurally similar methyl-salicylate, but not to the  
32 structurally unrelated diacetyl. In contrast, diacetyl preconditioning augments diacetyl  
33 avoidance and does not induce apparent molecular defenses. Reinforcement of the experiences  
34 using massed training forms relevant associative memories. Memory retrieval by the odor  
35 olfactory cues leads to avoidance of food contaminated by diacetyl and context-dependent  
36 behavioral decision to avoid benzaldehyde only if there is an alternative, food-indicative odor.

## 37 **Conclusions**

38 Our findings reveal a regulatory link between physiological stress responses and learned  
39 behavior which facilitates self-protection in real and anticipated stresses. The potential  
40 conservation of this somato-neuronal connection might have relevance in maladaptive avoidant  
41 human behaviors.

## 42 **Background**

43 Adequate, coordinated responses of multicellular organisms are key to adapt to and  
44 overcome fundamental alterations of the environment (1–3). These responses originate from  
45 intracellular molecular defenses, such as the oxidative, xenobiotic, metabolic and proteotoxic  
46 stress responses, which guard homeostasis and confer cytoprotection against the respective  
47 stresses, promoting physiological adaptation, fitness and longevity at the organismal level (4).  
48 Adaptation also involve complex behavioral responses orchestrated by the neuroendocrine  
49 system (5–7). For instance, sensory cues representing danger evoke aversive behavior as a result  
50 of perception of multiple sensory stimuli, neuronal processing and decision making both in  
51 humans and in other species (8–10). In some cases, the neural impulse of perceived danger is  
52 so intense that the organism decides to avoid co-occurring cues representing life-sustaining  
53 qualities such as food (6, 11). Besides external sensory cues, decision making is modulated by  
54 neural context like arousal, motivation, and reward (12, 13). Importantly, behavioral decisions  
55 are also influenced by sensory cues that evoke associative memories of past events (14).  
56 Moreover, exaggerated, inadequate avoidant behavior is characteristic to human anxiety  
57 disorders such as phobias (11), where sometimes intense physical symptoms of toxicity and  
58 disgust are evoked by olfactory cues. Although the neuroendocrine mechanisms of stress are  
59 extensively studied, the contribution of somatic, especially intracellular defenses to behavioral  
60 regulation is largely unknown.

61 The soil nematode *Caenorhabditis elegans* with its 959 cells is a versatile model system  
62 to study the link between cytoprotective stress responses and behavior. Worms, using a well-  
63 defined network of 302 neurons are capable of complex behavioral decisions (15–17). Flavors  
64 and volatiles have great impact on decision making of nematodes, informing about possible  
65 nutrition and danger *via* neuronal processing of olfactory and gustatory cues (16). Besides well

66 characterized escape responses, tissue damaging insults, such as toxins and pathogens, induce  
67 a network of evolutionary conserved cytoprotective defenses in each somatic cell and in  
68 specialized tissues (4). Fixing the actual damage as well as eliminating damaging agents are  
69 key mechanisms of cellular protection (18). Nematodes and mammals share diverse molecular  
70 processes to recognize and overcome toxic, stressor agents, such as the FOXO and Nrf2  
71 pathways. A key oxidative and metabolic stress response regulator in *C. elegans* is the FOXO  
72 ortholog DAF-16 transcription factor (19). DAF-16 is ubiquitously expressed, localized in the  
73 cytosol, and is activated by nuclear translocation in response to oxidative and genotoxic agents,  
74 starvation, desiccation and heat stress (20). Loss-of-function mutations or RNAi knockdown of  
75 *daf-16* results in compromised resistance to multiple stresses and shorter lifespan (21).

76 The Nrf-2 orthologue SKN-1 transcription factor is the major xenobiotic and oxidative  
77 stress regulator in nematodes (18, 22). Its nuclear translocation is induced by dietary restriction,  
78 pathogen attack, the INS/IGF-1 and TIR-1/PMK-1 pathways to modulate cellular respiration,  
79 enhance oxidative stress resistance, immunity and systemic detoxification defenses (22–24).  
80 SKN-1 cooperates with numerous stress related pathways and regulators including DAF-16 and  
81 the *C. elegans* heat-shock transcription factor orthologue HSF-1 to fine-tune cytoprotective  
82 gene expression patterns (18). Upregulation of specific and overlapping molecular stress  
83 responses underlies an adaptive process called physiological conditioning hormesis in stress  
84 biology (25). In course of hormesis, a conditioning stress exposure results in increased survival  
85 under a subsequent, lethal stress evoked by the same or a different stressor, a phenomenon  
86 called stress tolerance or cross tolerance, respectively. To clearly discriminate physiological  
87 and behavioral terms, we use the term preconditioning for physiological conditioning and  
88 introduce a new term, behavioral tolerance for diminished avoidance.

89 Recent studies in *C. elegans*, including ours provided evidence that pathogen and toxin  
90 induced stresses simultaneously stimulate cytoprotective responses and aversive behavior (26–

91 28). In this study, we set out to investigate how the induction of systemic cytoprotective  
92 molecular defenses influence stress-induced aversive behavior and learned behavioral  
93 decisions. To this end, we employed two food-derived volatile odors, benzaldehyde (BA) and  
94 diacetyl (DA), which are attractive at low, but aversive at high concentrations (29, 30). The  
95 advantage of these odors is that they contain both the chemosensory cue as well as a dual,  
96 attractive or aversive property. Our results indicate a critical role of the ability to mount specific  
97 somatic cytoprotective responses in shaping adaptive stress-induced and future behavioral  
98 decisions based on associative learning.

99

## 100 **Results**

### 101 **Concentrated benzaldehyde and diacetyl induce toxicity and food avoidance**

102 Low concentrations of food odors are attractive to *C. elegans*, whereas high concentrations  
103 induce an aversive response (30). Specifically, worms exhibit a biphasic chemotaxis curve  
104 towards concentrated 100% benzaldehyde (ccBA) called benzotaxis (Nuttley et al., 2001 and  
105 Fig. S1A). We hypothesized that the second, aversive phase is a defensive behavioral response  
106 to ccBA toxicity. Indeed, we found that longer ccBA exposures using the aversive concentration  
107 ranges induced extensive paralysis in a dose- and time-dependent manner (Fig. 1A). To  
108 investigate whether another concentrated food odor may induce toxicity at aversive  
109 concentrations, we tested the chemically unrelated diacetyl. Undiluted diacetyl (ccDA) also  
110 triggered biphasic chemotaxis behavior (Fig. S1B) and dose-dependent paralysis at  
111 approximately four-fold higher doses compared to ccBA (Fig. 1B). Furthermore, aversive, but  
112 lower doses of ccBA and ccDA both impaired thermotolerance (Fig. S1C), demonstrating  
113 compromised organismal integrity and stress resistance in response to odor toxicity. Therefore,  
114 we used non-paralyzing doses of odors as a source of toxic stress throughout this study.

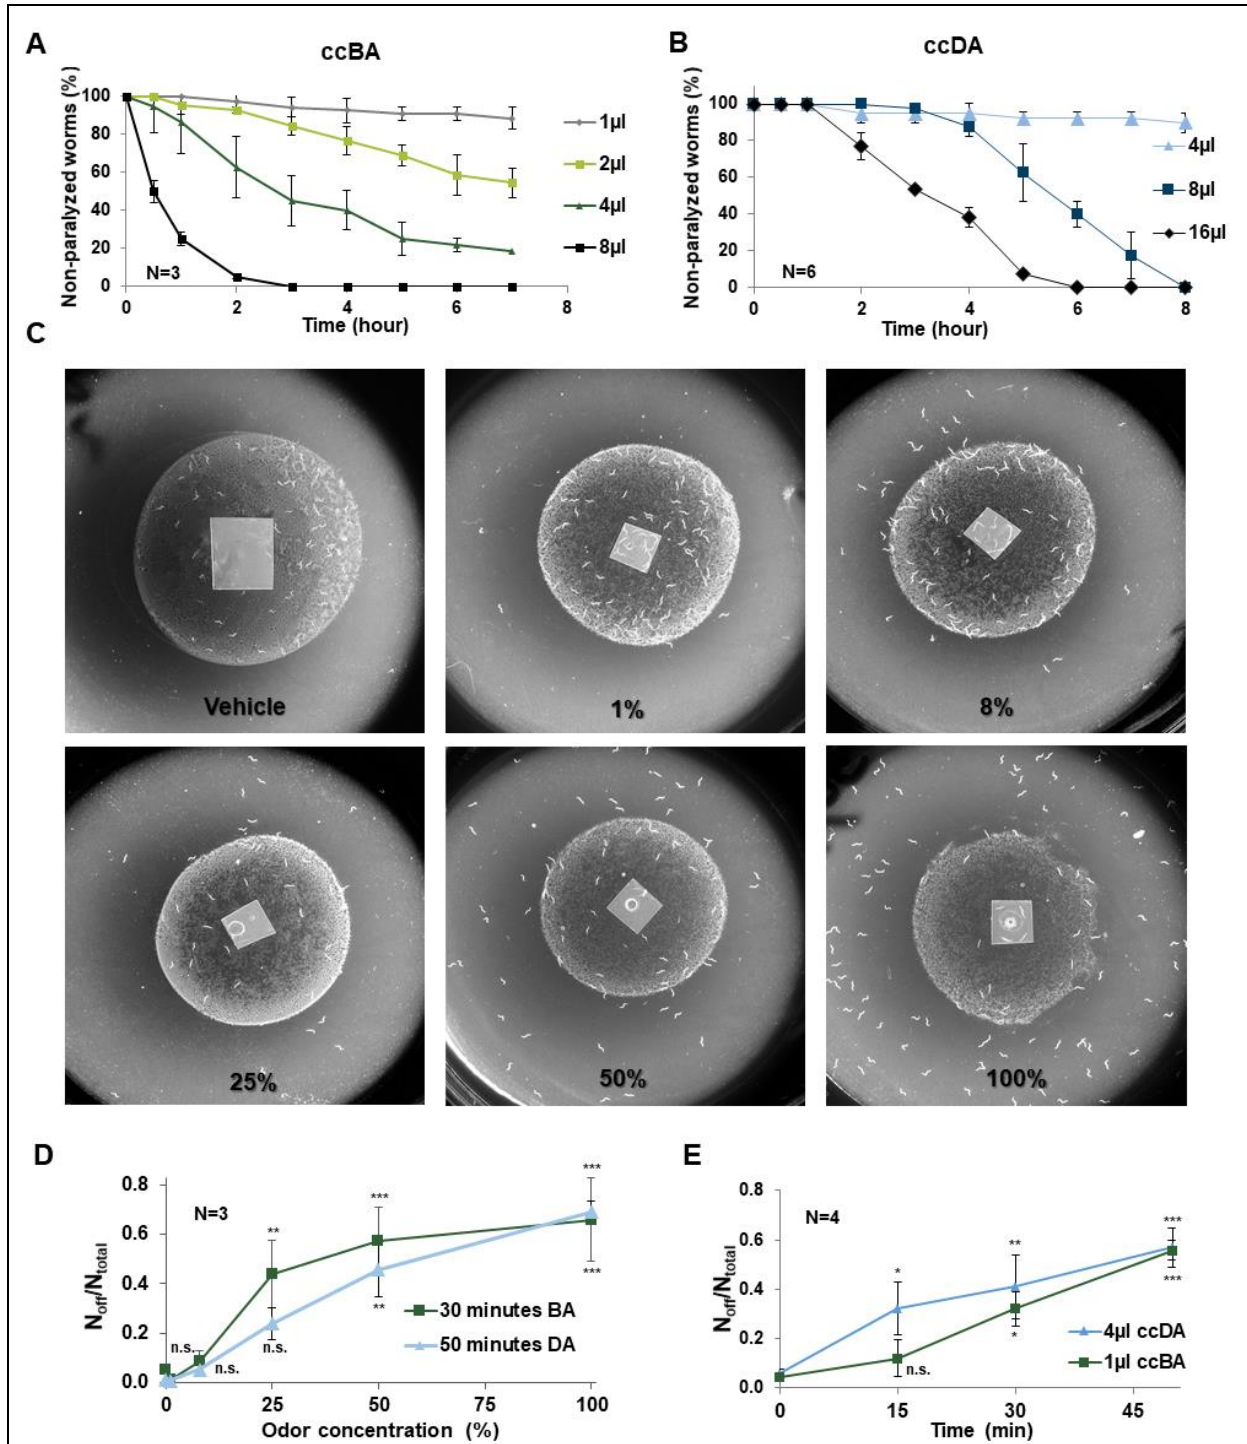

115

116 **Fig. 1. Concentrated benzaldehyde (ccBA) and diacetyl (ccDA) induce toxicity and food**  
 117 **avoidance in the aversive concentration range.**

118 Time-dependence curves of paralysis to various doses of ccBA (A) or ccDA (B) using a hanging  
 119 drop assay. (C) Representative images of food leaving behavior in response to various

120 concentrations of BA. BA was placed in ethanol vehicle in a total volume of 1  $\mu$ l in the middle  
121 of bacterial lawn. (D) Dose dependence of BA and DA induced food avoidance. BA or DA was  
122 placed in a total volume of 1  $\mu$ l or 4  $\mu$ l in the middle of bacterial lawn. (E) Time dependence of  
123 ccBA and ccDA induced food avoidance. Data are expressed as mean  $\pm$  SEM, N = number of  
124 independent experiments. \* $p < 0.05$ ; \*\* $p < 0.01$ ; \*\*\* $p < 0.001$ . Mean durations of odor  
125 exposure that induced 50% paralysis by log rank (Mantel-Cox) test were as follows: ccBA – 2  
126  $\mu$ l: 5.27 h  $\pm$  0.17 hours, 4  $\mu$ l: 2.94  $\pm$  0.21 hours, 8  $\mu$ l: 0.94  $\pm$  0.14 hours. ccDA? – 8  $\mu$ l: 5.68  $\pm$   
127 0.20 hours, 16  $\mu$ l: 3.46  $\pm$  0.17 hours. P-values compared to 1  $\mu$ l BA or 4  $\mu$ l DA treatments are  
128  $<0.001$  in all conditions.

129 Although food is not necessary for adult worms' survival, worms are continuously feeding and  
130 seldom leave the bacterial lawn under laboratory conditions (31). Therefore, to establish a more  
131 stringent test for behavioral adaptation, we placed a ccBA drop in the middle of an *E. coli* OP50  
132 lawn and monitored food avoidance. We observed that while unexposed worms remained on  
133 the lawn after 50 minutes, the majority of ccBA-exposed worms left the food (Fig. 1C). We  
134 observed similar, concentration- and time-dependent food aversion phenotypes with both ccBA  
135 and ccDA (Fig. 1D, E). These findings indicate that the perception of toxic stress initiates a  
136 decision to leave the lawn, giving up the benefit of nutrients for the protection of physical  
137 integrity.

### 138 **Opposing behavioral patterns elicited by toxic benzaldehyde and diacetyl exposure**

139 We observed that transient ccBA and ccDA exposure increased motility (Fig. S2A), indicating  
140 that perception of toxic stress increases locomotor activity which may help instantly avoid the  
141 threat. Interestingly, the increased motility returned to baseline after removing ccBA, but  
142 showed a sustained elevation after the removal of ccDA (Fig. S2A). Moreover, we found that  
143 after an extended, 2-hour exposure to ccBA, animals started to return to the bacterial lawn,



144 whereas the same exposure to ccDA further increased aversion (Fig. S2B). Thus, the adverse  
145 physiological effects of ccBA might be eliminated faster than those of ccDA. We reasoned that  
146 a preconditioning exposure might differentially affect behavior. To test this, after exposure to  
147 the same sublethal doses of odors we investigated the lawn avoidance behavior of naive and  
148 preconditioned worms (Fig. 2A). Indeed, we found that preconditioning with ccBA diminished  
149 ccBA-induced aversion, while that with ccDA further increased avoidance of ccDA (Fig. 2A,  
150 B). For the increased capacity of worms to remain in the presence of toxic ccBA we coined the  
151 term “behavioral tolerance”, to the analogy of physiological stress tolerance. Thus, ccBA  
152 preconditioning induces behavioral tolerance, while ccDA preconditioning induces  
153 sensitization. The effect developed by a 2-hour preconditioning and was only moderately  
154 altered by further increasing the duration of the preconditioning exposure (Fig. S2C and D).

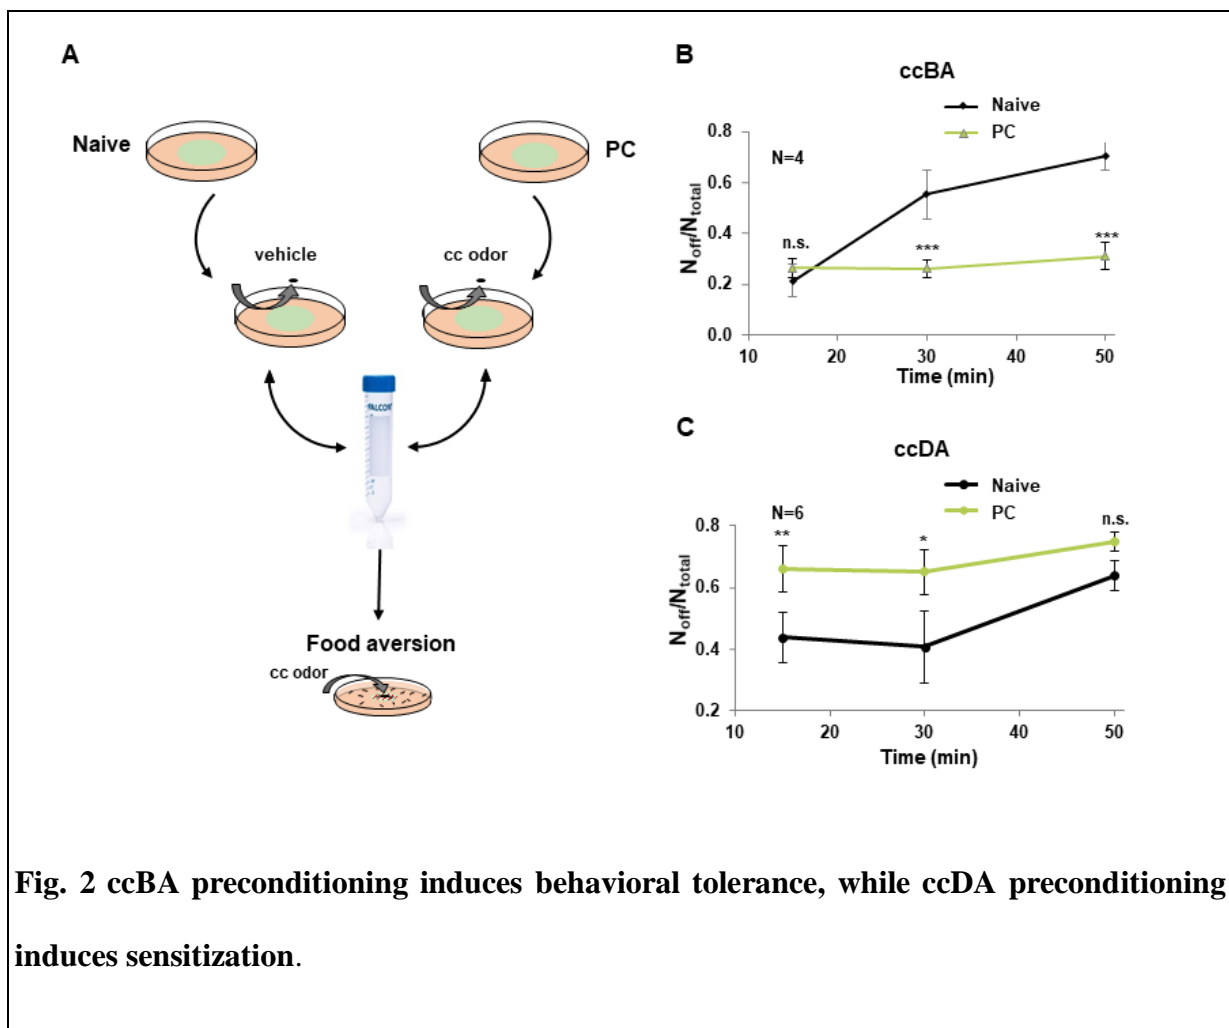

158 (A) Experimental setup for preconditioning and food aversion test. Animals were exposed to a  
159 hanging drop of concentrated odor (preconditioned, PC) or vehicle (naive), washed and assayed  
160 for food aversion. (B) ccBA induced food aversion of naive and ccBA PC animals at different  
161 time points. (C) ccDA induced food aversion of naive and ccDA PC animals at different time  
162 points. Data are expressed as mean  $\pm$  SEM, N = number of independent experiments. \* $p < 0.05$ ;  
163 \*\* $p < 0.01$ ; \*\*\* $p < 0.001$ .

164

### 165 **Concentrated benzaldehyde, but not concentrated diacetyl, activates specific systemic** 166 **cytoprotective responses**

167 In agreement with our findings on the toxicity of ccBA, previous studies demonstrated that BA  
168 induced oxidative stress (32, 33). Therefore, we tested various oxidative stress response  
169 pathways that might be involved in the organismal adaptation to ccBA. Using the TJ356 strain  
170 expressing GFP-tagged DAF-16, we observed that ccBA exposure induced a strong nuclear  
171 translocation of DAF-16, comparable to that induced by heat stress. However, DAF-16  
172 remained cytosolic in response to ccDA (Fig. 3A and Fig. S3A). The shift in DAF-16  
173 localization exhibited a clear BA dose-dependence (Fig. S3B). These congruent changes in  
174 DAF-16 translocation and food avoidance (cf. Fig. 1D) indicate a potential link between  
175 cytoprotective responses and behavioral tolerance.

176 Next, we tested several other stress and detoxification pathways using GFP-tagged marker  
177 strains. Translocation of the oxidative-xenobiotic stress master regulator SKN-1::GFP in the  
178 LD001 strain was induced by ccBA, but not by ccDA, comparable to that seen upon the  
179 oxidative agent paraquat (PQ) treatment (Fig. 3B). Further, ccBA, but not ccDA induced the  
180 expression of the phase I marker cytochrome P450 enzyme *cyp-35b* and the phase II enzyme  
181 *gst-4* (Fig. 3C-F). The induction of *cyp-35b* was abolished by *daf-16* RNAi, while that of *gst-4*

182 was abolished by *skn-1* RNAi (Fig. 3D, F). Importantly, neither the HSF-1 and DAF-16 target  
183 *hsp-16.2*, and the HSF-1 target and endoplasmic reticulum unfolded protein response (UPR)  
184 reporter *hsp-4*, nor the SKN-1 dependent *gcs-1* and the DAF-16 dependent *sod-3* reporter was  
185 induced by ccBA (Fig. S3C). These findings demonstrate that a specific stress and  
186 detoxification response involving a subset of DAF-16 and SKN-1 activated genes is required  
187 for the molecular defense against ccBA toxicity.

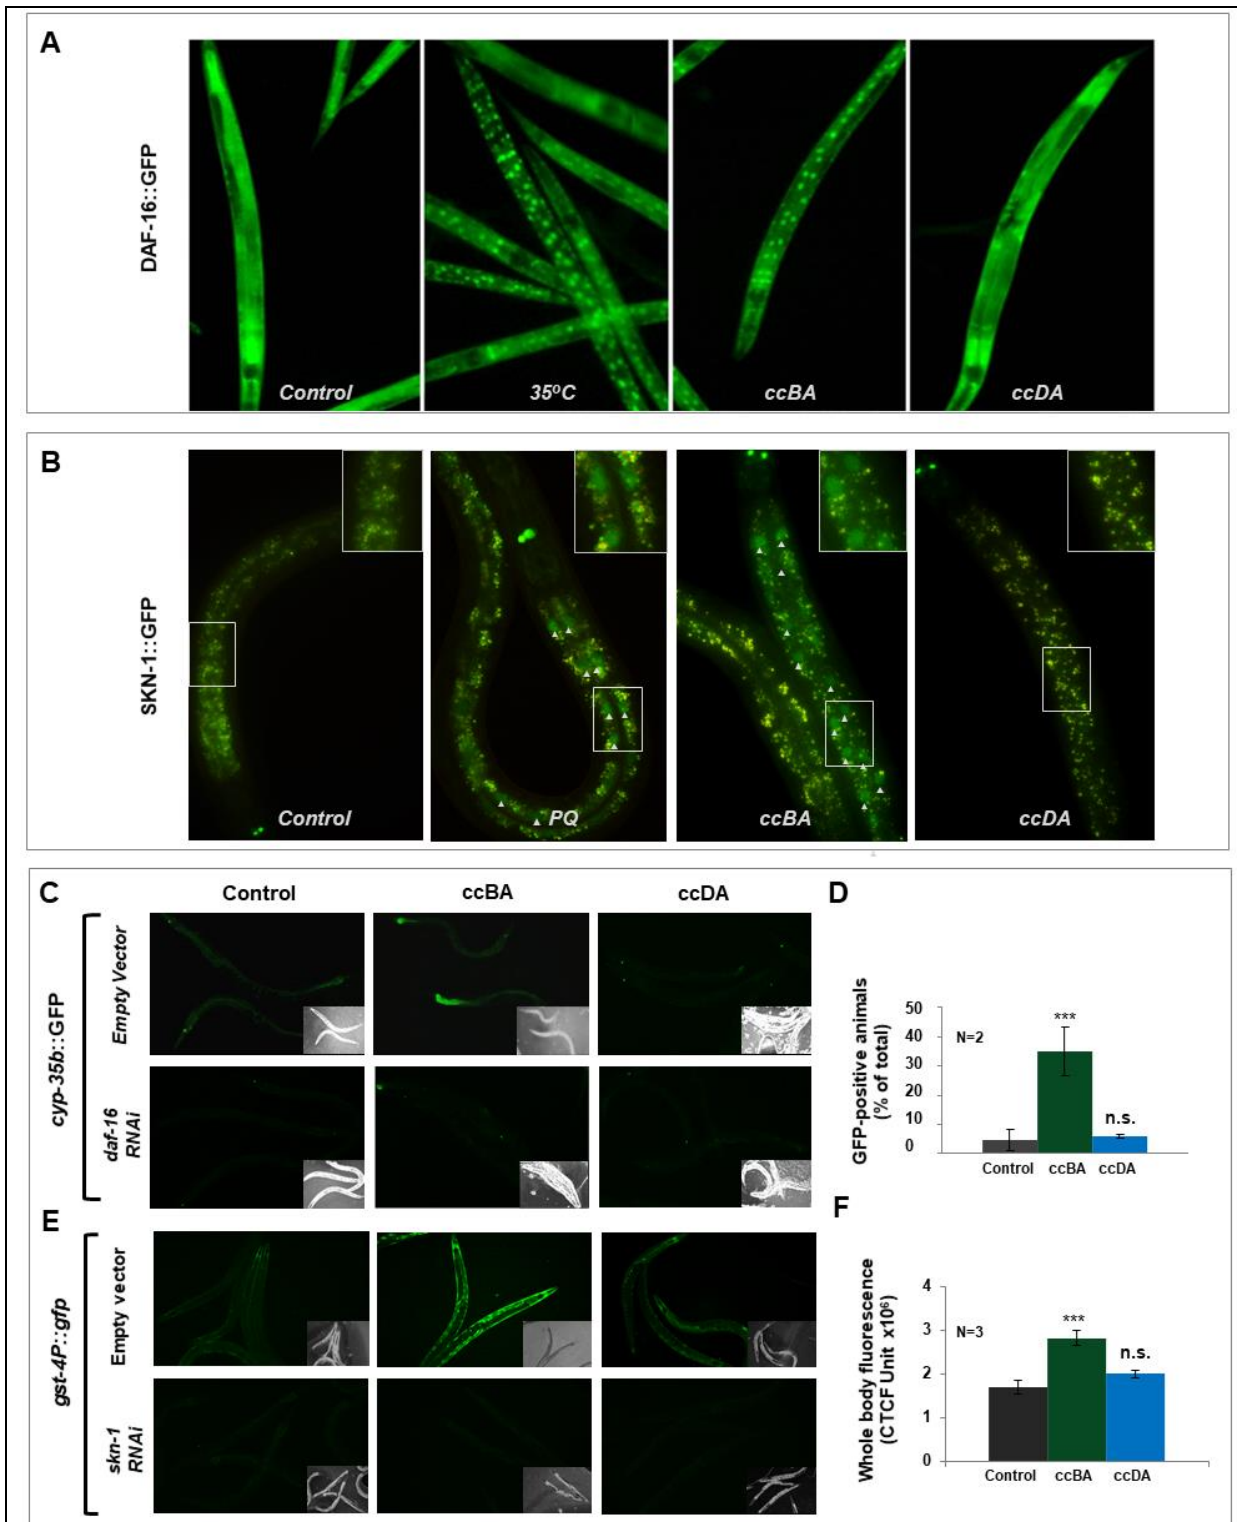

188

189 **Fig. 3. ccBA, but not ccDA, activates specific systemic cytoprotective responses.**

190 Representative epifluorescent microscopic images of DAF-16::GFP nuclear translocation in

191 response to heat stress, ccBA or ccDA (A), as well as *SKN-1::GFP* nuclear translocation in

192 response to paraquat, ccBA or ccDA (B, arrowheads). Representative epifluorescent

193 microscopic images (C) and quantification (D) of *cyp-35b::GFP* expression in response to  
194 ccBA or ccDA in worms fed by control EV and *daf-16* RNAi. Representative epifluorescent  
195 microscopic images (E) and quantification (F) of *gst-4::GFP* expression in response to ccBA  
196 or ccDA in nematodes fed by control EV and *skn-1* RNAi. Data are expressed as mean  $\pm$  SEM,  
197 N = number of independent experiment replicates. n.s.: not significant, \* $p < 0.05$ ; \*\* $p < 0.01$ ;  
198 \*\*\* $p < 0.001$ .

199

## 200 **ccBA-induced cytoprotective responses confer behavioral tolerance to ccBA, but not to** 201 **ccDA**

202 We asked whether the cytoprotective responses induced by ccBA which are known to induce  
203 physiological stress tolerance might play a role in the generation of behavioral decisions. To  
204 this end, we preconditioned N2 and *daf-16* null mutant nematodes with ccBA and studied their  
205 food avoidance to ccBA. We found that naive *daf-16* mutants showed avoidant behavior  
206 comparable to wildtype, however, they failed to decrease their aversion in response to  
207 preconditioning (Fig. 4A). Similar phenotype was obtained by silencing the evolutionarily  
208 conserved molecular chaperone Hsp90, which was shown to regulate DAF-16 activity (34) (Fig.  
209 4B). Likewise, *skn-1* silencing similarly prevented the development of behavioral tolerance,  
210 whereas the activation of SKN-1 by knocking down the WDR-23 protein responsible for its  
211 degradation (35) augmented behavioral tolerance towards ccBA (Fig. 4C). In sharp contrast,  
212 after ccDA preconditioning, neither *skn-1*, nor *wdr-23* RNAi altered the behavioral sensitization  
213 towards ccDA exposure (Fig. 4D). RNAi did not silence neuronal Hsp90 and SKN-1 isoforms  
214 (Papp et al., 2012; Somogyvári et al., 2018 and data not shown) in agreement with its inability  
215 to enter neurons (36). These results indicate that specific cytoprotective responses of somatic  
216 cells induced by toxic ccBA exposure actively participate in the development of behavioral  
217 tolerance.

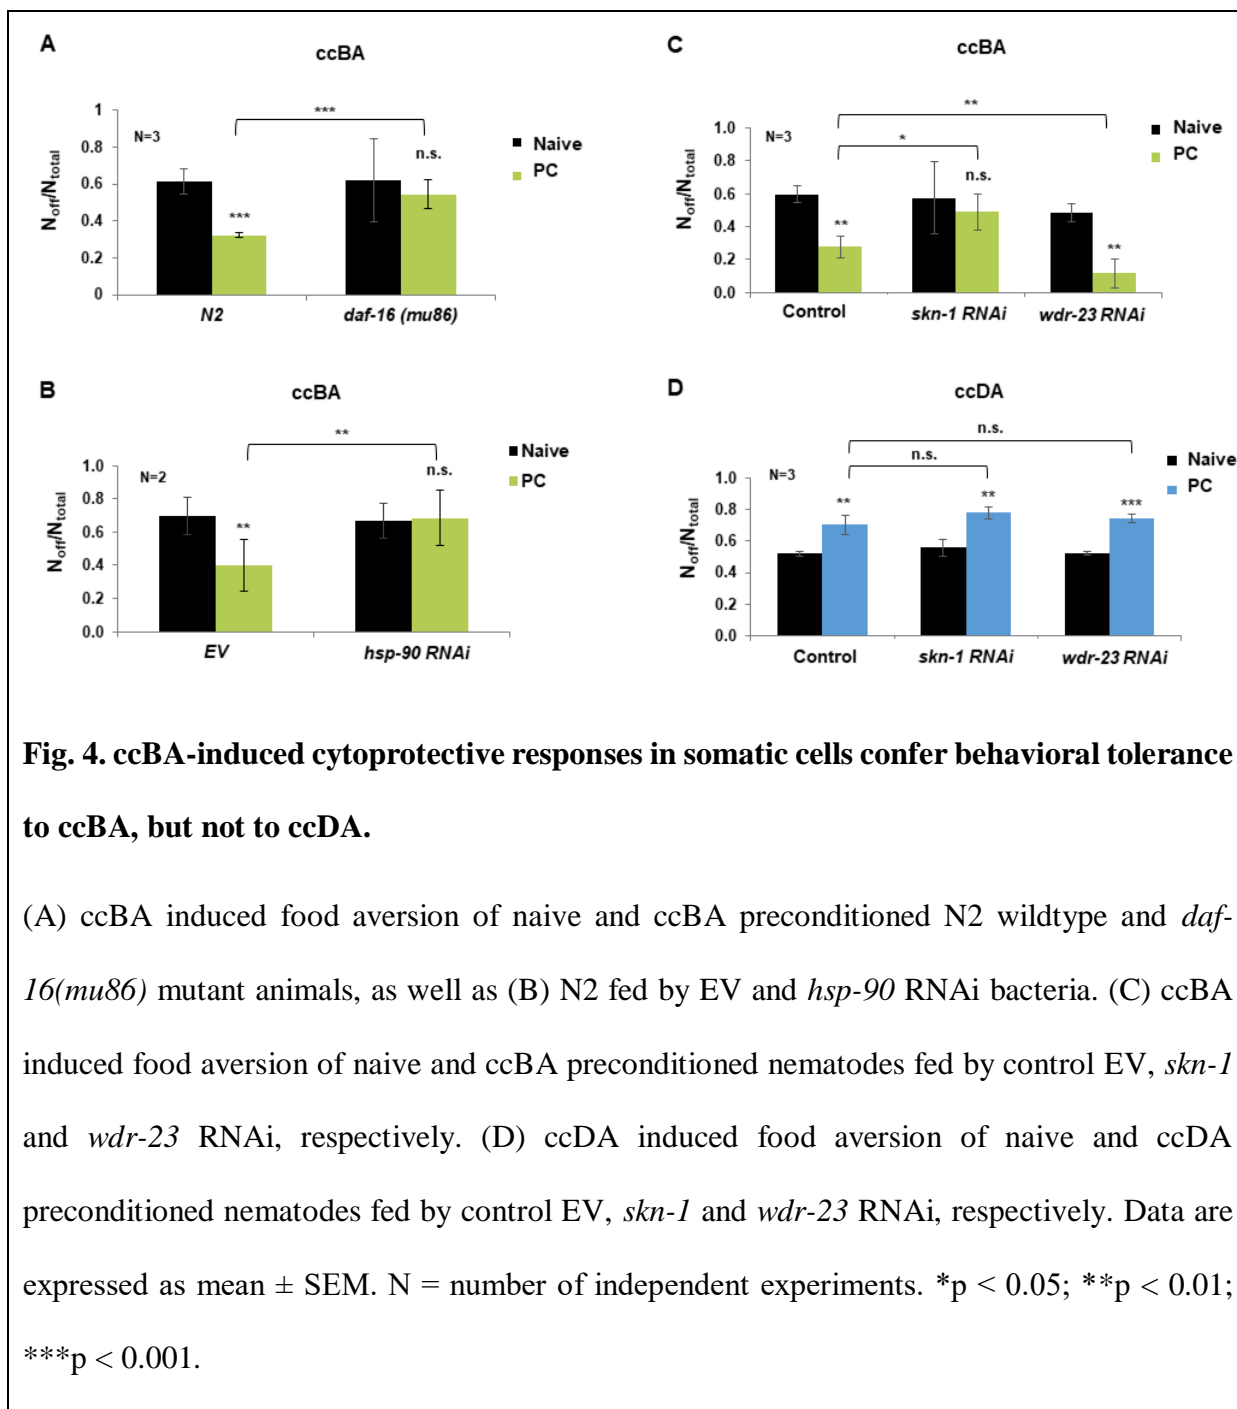

228

229 **Behavioral cross-tolerance is mediated by chemical structure-specific cytoprotective**

230 **responses**

231 Xenobiotic-induced stress and detoxification responses are related to the chemical structure of

232 the toxin as well as the nature of damage they induce (37). We reasoned that the observed BA-

233 dependent cytoprotective machinery might also be induced in response to a chemically similar  
234 toxic compound. BA is both spontaneously as well as enzymatically oxidized to benzoic acid  
235 during its detoxification (33, 38, 39) (Fig. 5A). The chemical structure of the volatile plant  
236 stress hormone methyl-salicylate (MS) (40), harboring an aromatic benzene ring and an  
237 esterified carboxyl group is closely related to that of benzaldehyde and benzoic acid (Fig. 5A).  
238 We found that similarly to ccBA, concentrated MS (ccMS) was also toxic and induced food  
239 avoidance behavior (Fig. S4A and B). Moreover, ccMS and ccBA shared identical molecular  
240 defense responses, including DAF-16 translocation, *cyp-35b::GFP* and *gst-4P::gfp* expression  
241 (Fig. 5B). Importantly, preconditioning with either ccMS or ccBA reduced food aversion in  
242 response to a subsequent ccMS exposure (Fig. 5C). However, ccBA preconditioning did not  
243 affect food aversion in the presence of ccDA, indicating that DAF-16 and SKN-1 dependent  
244 processes are unable to reduce ccDA toxicity (Fig. 5D). We conclude that the BA-specific  
245 cytoprotective responses confer behavioral cross-tolerance towards a toxin harboring a similar  
246 chemical structure, but not towards another compound, DA, which is unrelated chemically and  
247 probably by mechanism of action.

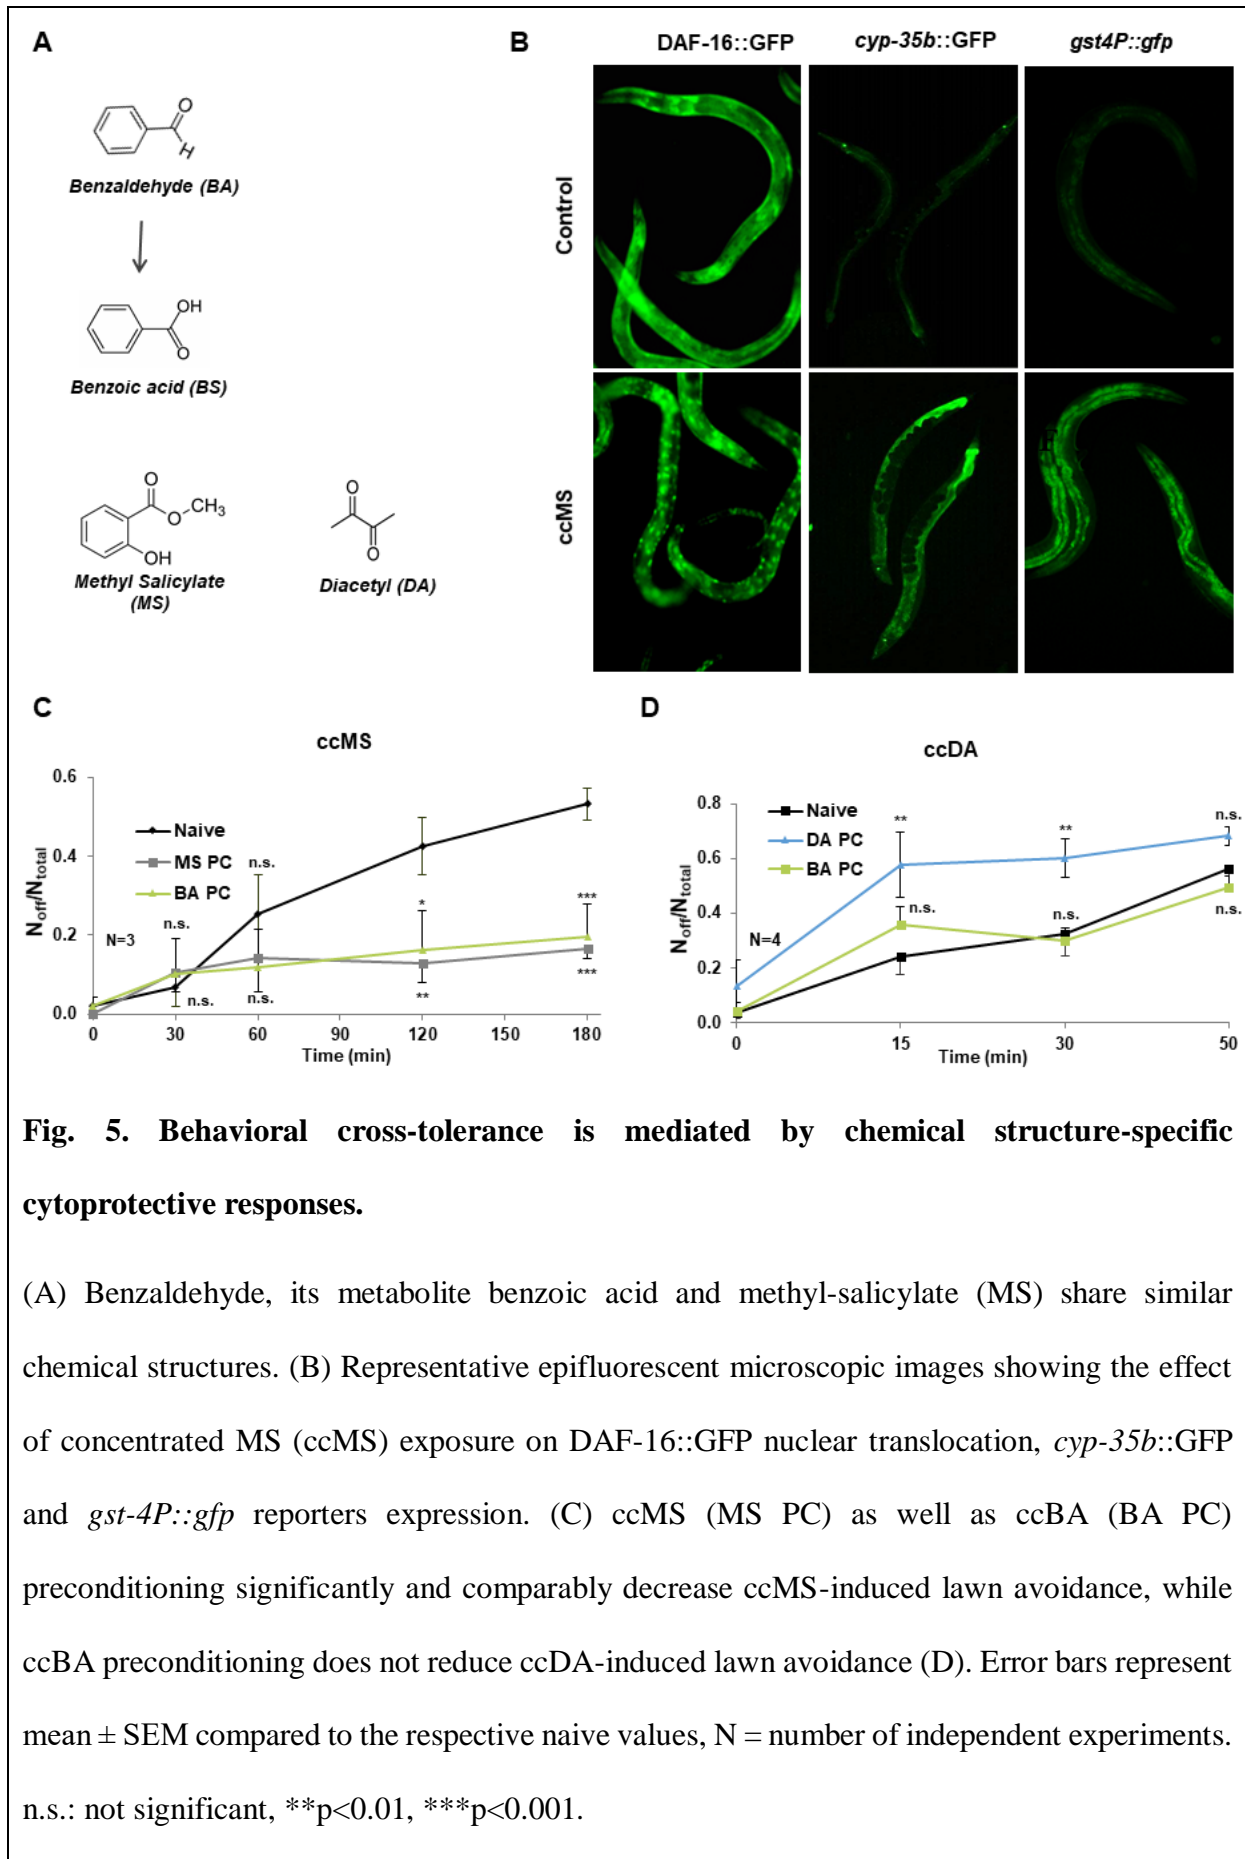



259 **Deficient or efficient cellular defenses generate relevant learned behaviors to stress-**  
260 **associated olfactory cues**

261 The lack of behavioral tolerance in case of ccDA preconditioning indicates inefficient cellular  
262 protection, in agreement with our findings (see Fig. 3). Moreover, the phenomenon of  
263 behavioral sensitization, a significantly faster and more pronounced aversive response towards  
264 the odor suggests a role for avoidant associative learning. To test this, we investigated  
265 alterations in behaviors towards attractive (1%) doses of DA and BA after pre-exposure of  
266 toxic, concentrated doses of the respective odors (Fig. 6A). Indeed, worms preconditioned with  
267 ccDA significantly reduced their chemotaxis towards naturally attractive 1% DA (Fig. 6B) and  
268 even chose to leave the food in the presence of 1% DA (Fig. 6C). We also investigated decision  
269 making by providing both DA and BA naturally associated with food in an odor choice assay.  
270 The aversive change of the DA olfactory cue was underscored by an almost complete shift in  
271 odor preference to BA (Fig. 6D). In contrast, worms preconditioned with ccBA did not leave  
272 the bacterial lawn in the presence of 1% BA (Fig. 6F). Moreover, they maintained their  
273 chemotaxis towards, 1% BA (Fig. 6E), when the olfactory cue of BA was the only option.  
274 However, they displayed reduced preference to BA in the simultaneous presence of attractive  
275 DA (Fig. 6G). These results are consistent with the formation of distinct, avoidant or tolerant  
276 learned behaviors associated to the sensory cues of DA and BA, respectively, after a previous  
277 encounter with their toxic doses, which appear to stem from the prior internal experience  
278 resulting from a deficient or efficient cytoprotection.

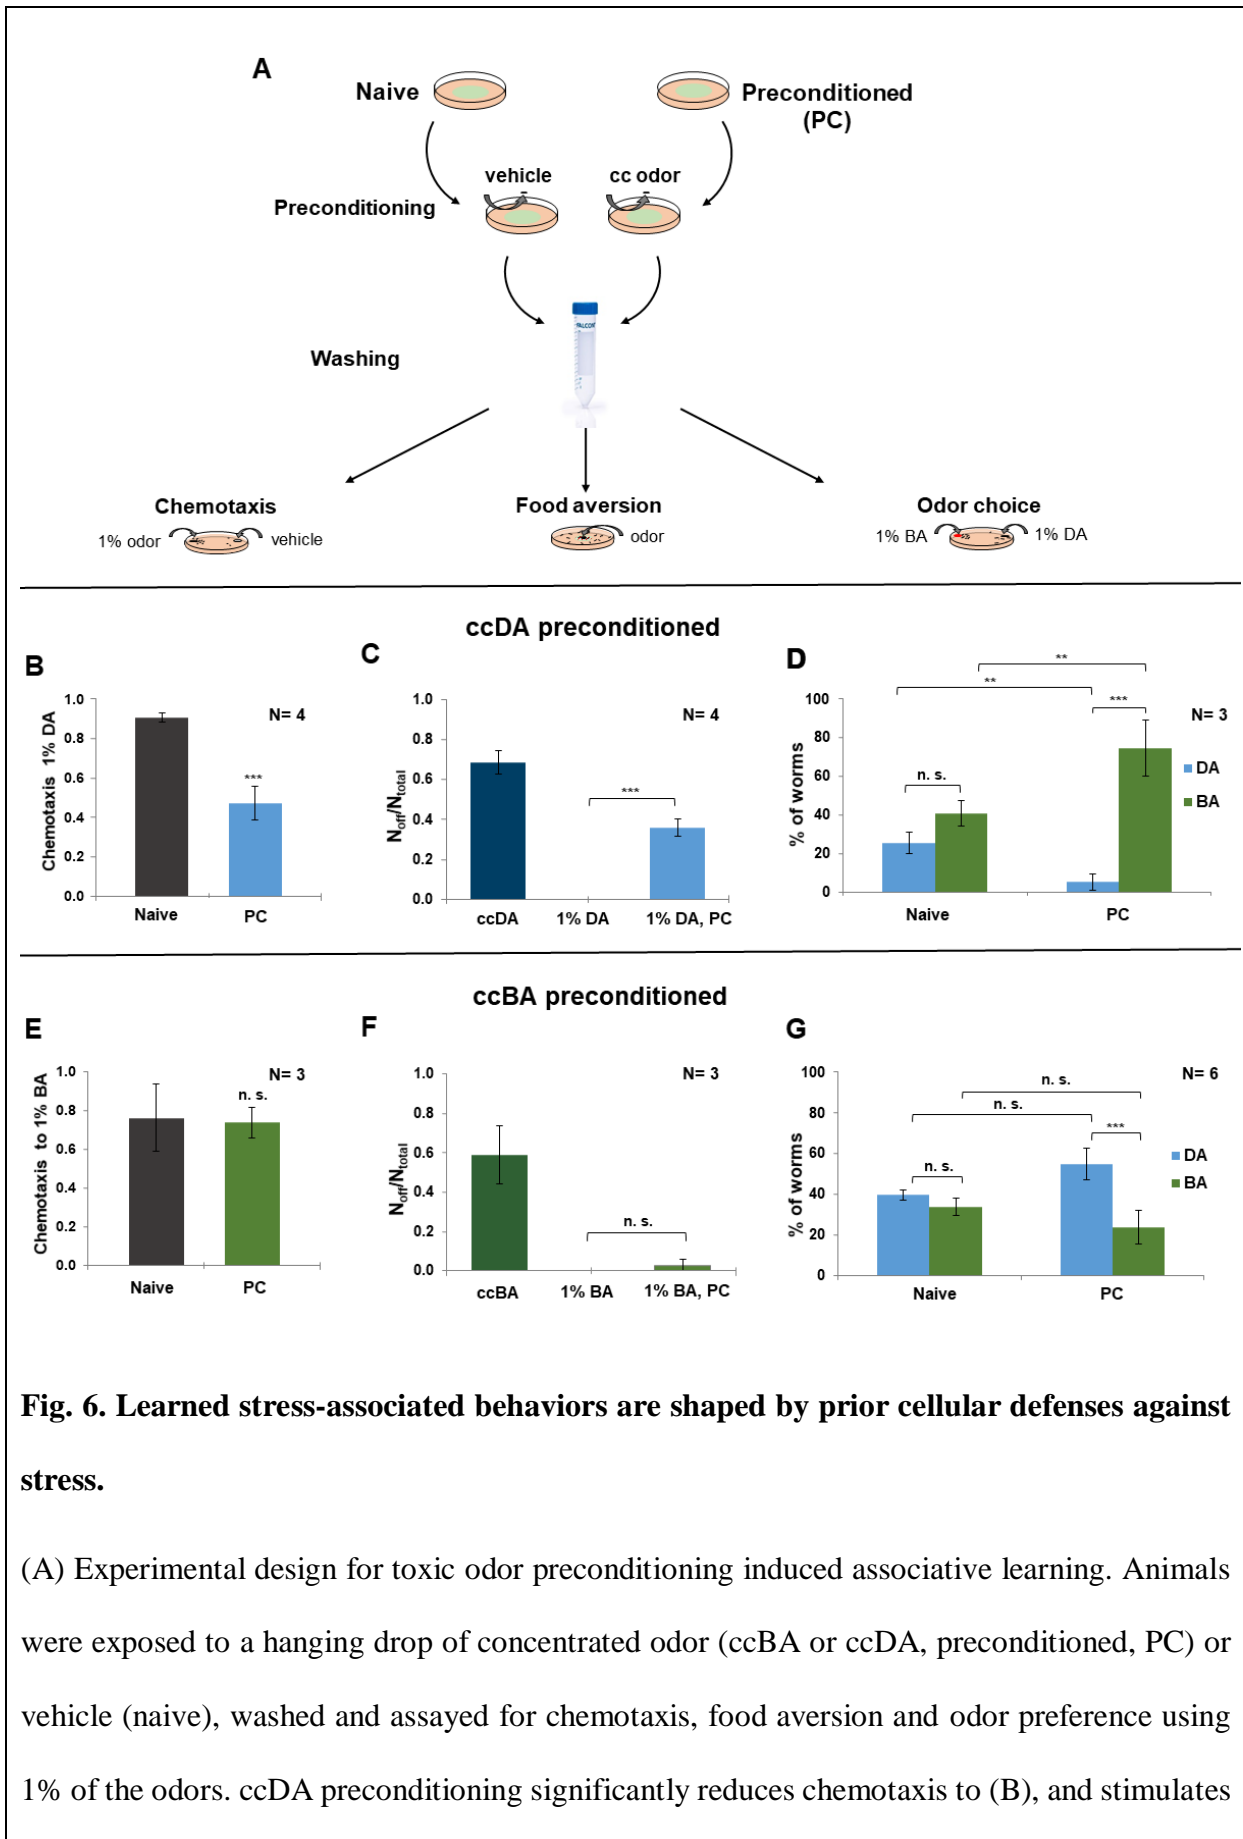

279

280 **Fig. 6. Learned stress-associated behaviors are shaped by prior cellular defenses against**

281 **stress.**

282 (A) Experimental design for toxic odor preconditioning induced associative learning. Animals

283 were exposed to a hanging drop of concentrated odor (ccBA or ccDA, preconditioned, PC) or

284 vehicle (naive), washed and assayed for chemotaxis, food aversion and odor preference using

285 1% of the odors. ccDA preconditioning significantly reduces chemotaxis to (B), and stimulates

286 lawn avoidance from (C) 1% DA, and entirely shifts odor preference to 1% BA (D). ccBA  
287 preconditioning does not affect chemotaxis to (E), and lawn avoidance from (F) 1% BA, but  
288 induces a modest reduction of preference to 1% BA in the presence of 1% DA (G). Odor choice  
289 was quantified by scoring worms on BA and DA spot. Error bars represent mean  $\pm$  SEM. N =  
290 number of independent experiments. n.s.: not significant, \* $p < 0.05$ ; \*\* $p < 0.01$ ; \*\*\* $p < 0.001$ .

291

## 292 **A stress-associated memory of somatic resilience enables context-dependent decision** 293 **making**

294 The association of naturally attractive odors with learned stress-reactive behaviors raises the  
295 possibility that the learned experiences may give rise to associative memories to cope with a  
296 similar anticipated future insult. On the other hand, forgetting irrelevant experiences is also  
297 important as both the organism and the environment is changing. Indeed, a 2-hour recovery  
298 period after a single ccBA preconditioning of two or four hours significantly attenuates  
299 behavioral tolerance in the food leaving assay (Fig. 7B). We reasoned that repeated exposure  
300 of the same conditions might reinforce the co-occurring experience resulting in a lasting neural  
301 representation. To test this, we employed a protocol of massed training known to induce short  
302 and intermediate term associative memories (STAM and ITAM) (41, 42) (Fig. 7A). By  
303 definition, STAM decays within, whereas ITAM persists over, one hour. Massed training of  
304 one-hour exposure to ccBA four times resulted in a potent behavioral tolerance that was retained  
305 after a 2-hr recovery (Fig. 7C). A single 4-hour preconditioning, a physiological stress of the  
306 same duration induced comparable food aversion immediately after training (cf. Figs. 6F and  
307 7C), which indicates similar levels of cytoprotection and makes it unlikely that the behavioral  
308 tolerance is a result of higher physiological stress tolerance. Likewise, ccDA massed training  
309 induced a robust food avoidance in the presence of 1% DA which persisted after 2-hr recovery  
310 (Fig. 7D). Again, massed-trained worms exhibited comparable aversive behaviors against 1%

311 DA as if they encountered ccDA (cf. Fig.s 2C, 6C and 7D). These results are consistent with  
312 the reinforcement of toxic stress-associated neurosensory integration into different associative  
313 memories of active coping or passive avoidance. The stability of memory after two hours  
314 indicates the formation of ITAM. Finally, we asked how the coping memories affect the choice  
315 between the stress-associated and a natural attractive odor olfactory cue. Massed training with  
316 ccBA almost entirely shifted the preference towards DA (Fig. 7E), potentiating the change  
317 already observed by a single preconditioning (Fig. 6G). This phenomenon also shows an  
318 apparent similarity to the complete disappearance of DA preference after a single  
319 preconditioning with ccDA (cf. Fig.s 7E and 6D). Nonetheless, in contrast to the compelling  
320 avoidant behavior to the memory of uncompensated harm, the memory of cellular protection  
321 not only provides the ability to cope with anticipated toxicity for food, but allows a context-  
322 dependent decision to spare resources when the organism also perceives the cue of a potentially  
323 toxin-free food. This result also suggests that the memory of a stressful insult contains the  
324 representation of the original valence of the olfactory cue, the internal experience of stress-  
325 induced harm and that of the activated physiological protection.

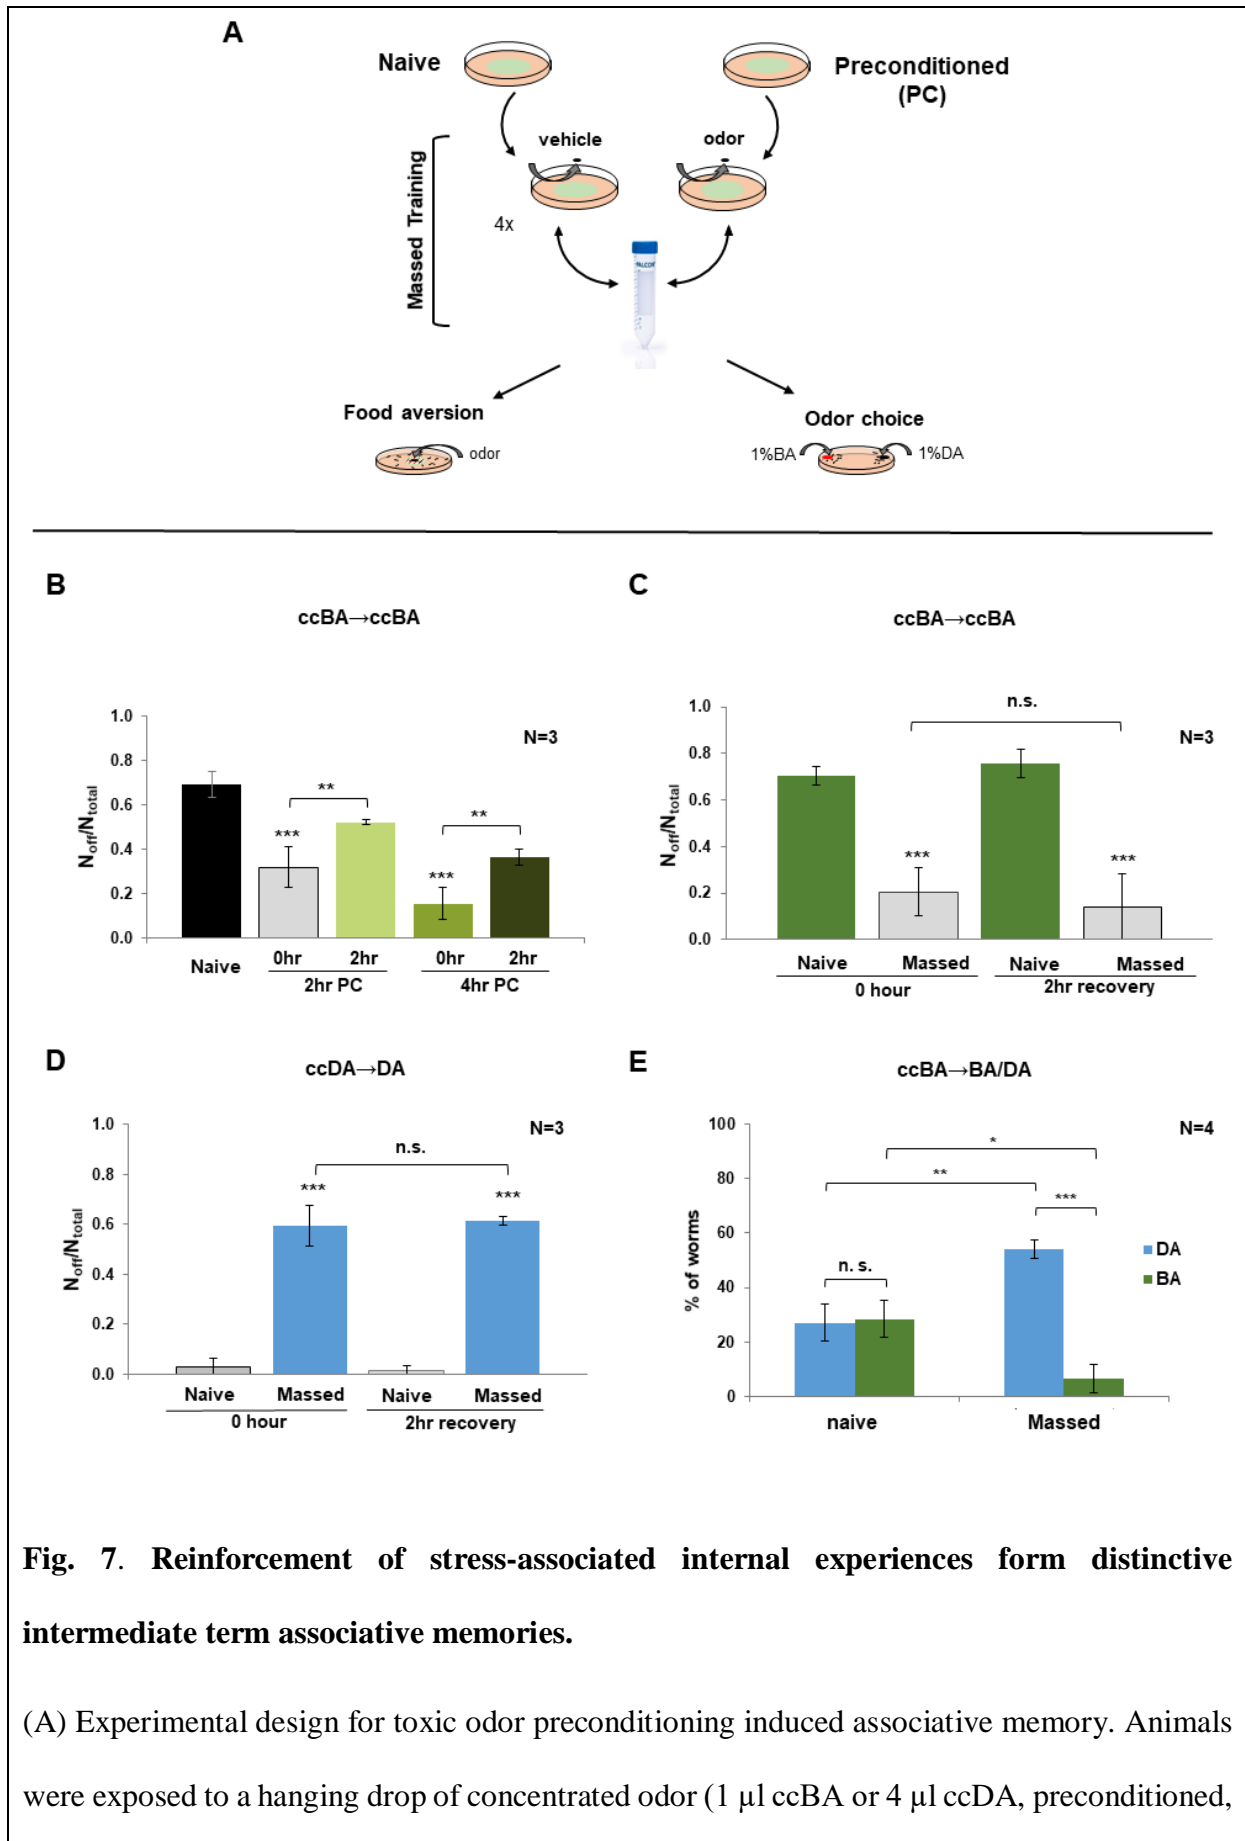

326

327 **Fig. 7. Reinforcement of stress-associated internal experiences form distinctive**  
 328 **intermediate term associative memories.**

329 (A) Experimental design for toxic odor preconditioning induced associative memory. Animals

330 were exposed to a hanging drop of concentrated odor (1  $\mu$ l ccBA or 4  $\mu$ l ccDA, preconditioned,

331 PC) or vehicle (naive), using a single preconditioning (B) or a 4x massed training protocol (C-  
332 E), then assayed for food aversion or odor preference immediately or after the indicated  
333 recovery periods. (B) A 2-hour recovery period decreases the food aversion elicited by a single  
334 2-hour or 4-hour ccBA preconditioning. (C) Nematodes exposed to a 4x1-hour ccBA massed  
335 training retain the behavioral tolerance to ccBA after a 2-hour recovery period. (D) Nematodes  
336 exposed to a 4x1-hour ccDA massed training maintain their avoidant behavior to 1% DA after  
337 a 2-hour recovery period. (E) A 4x1-hour ccBA massed training induces a robust shift in odor  
338 preference towards 1% DA. Odor choice was quantified by scoring worms on BA, DA and on  
339 the empty agar surface (0). Error bars represent mean  $\pm$  SEM, N = number of independent  
340 experiments. n.s.: not significant, \* $p < 0.05$ , \*\* $p < 0.01$ , \*\*\* $p < 0.001$ .

341

## 342 Discussion

343 In this study we have set up a paradigm in *C. elegans* to assess the impact of  
344 cytoprotective responses on behavioral decisions. We have shown that the innately attractive  
345 odors benzaldehyde and diacetyl, when employed at high concentrations, induce toxicity and  
346 behavioral aversion of the odor-contaminated bacterial lawn. ccBA-induced somatic  
347 cytoprotective responses involving DAF-16, SKN-1 and Hsp90 conferred behavioral tolerance  
348 to ccBA and cross-tolerance to concentrated methyl-salicylate (ccMS), while neither behavioral  
349 tolerance nor apparent molecular defenses were observed upon exposure to ccDA. Massed  
350 training generated an associative memory that made diluted DA aversive but enabled animals  
351 to decide whether to approach or to avoid diluted BA depending on alternative choice. Our  
352 study suggests that the (in)ability of *C. elegans*' somatic cells to counteract toxic stress with  
353 cytoprotective mechanisms regulates behavior during stress and determines learned behavioral  
354 decisions upon re-encounter with stress-associated olfactory cues (Fig. 8).

355 Previous studies reported either decreased attraction or aversion to high concentrations  
356 of food-derived odors (15, 29, 30, 43). One study proposed that the change in odor preference  
357 towards concentrated benzaldehyde was due to olfactory adaptation (29). Although this  
358 mechanism might hold true, several findings of our study argue for an alternative explanation.  
359 The (i) strong dose-dependent food aversion (Fig. 1C-E) (ii) increased motility (Fig. S2A) (iii)  
360 progressive dose-dependent paralysis (Fig. 1A, B) (iv) compromised thermotolerance (Fig.  
361 S1C) (v) induction of robust systemic cytoprotective responses by ccBA (Fig. 3) (vi) the  
362 comparable ccBA concentration dependence of aversion and DAF-16 nuclear translocation  
363 (Fig. 1D and Fig. S3B) (vii) the manipulation of these responses modulates the development of  
364 behavioral tolerance to ccBA (Fig. 4) (viii) RNAi is unable to penetrate neurons (36) all indicate  
365 somatic toxicity as an underlying mechanism. This interpretation gains support from the facts

366 that low concentrations of benzaldehyde and isoamyl alcohol mediate attraction via activating  
367 the AWC chemosensory neuron, whilst high concentrations activate the polymodal nociceptive  
368 ASH neuron, which in turn drives repulsion (15, 30, 43, 44). Consistent with our study, various  
369 studies in mammals describe the toxic effects of benzaldehyde (33, 45, 46) and diacetyl (47–  
370 49) such as inhalation toxicity and long-term impairment in lung function. Together with the  
371 evidence presented by the above reports, our study suggests that tissue damage caused by odor  
372 toxicity stimulates aversion (Fig. 8). Perhaps neural (29) and somatic (our study) inputs are  
373 integrated to increase the robustness of behavior. Our findings also draw attention to nematode  
374 associative learning experiments where different conditions are paired with concentrated odors  
375 (42, 50, 51), because odor toxicity might stimulate repulsion independently of, or  
376 synergistically with, the unconditioned stimulus. Therefore, behavioral experiments using  
377 diluted odors as the conditioned stimulus are recommended.

378 Our observations on the toxic odor-induced food aversion (Fig. 1) indicates this  
379 neurobehavioral response is a first line of defense against dangerous insults, which preserves  
380 physical integrity and spares resources. ccBA exposed worms, however, started to return to  
381 food during the second hour and a preconditioning exposure also diminished ccBA avoidance  
382 (Fig. S2B and Fig. 2B). Reduced avoidance coincided with DAF-16 and SKN-1 activation and  
383 induction of phase 1 and 2 xenobiotic detoxification reporters (Fig. 3), consistent with the  
384 aromatic structure and toxic profile of ccBA. Such cytoprotective stress and detoxification  
385 responses co-operate to ensure survival, stress tolerance, immunity and longevity (4, 18, 52,  
386 53), forming a cellular defense. Our findings that *daf-16* knockout, *hsp-90*, *skn-1* and *wdr-23*  
387 RNAi in somatic cells specifically modulate ccBA avoidance (Fig. 4) show that specific stress-  
388 responsive regulators control aversion, revealing a novel regulatory role of somatic  
389 cytoprotective responses on behavioral decisions.



390 We found ccBA-induced behavioral cross-tolerance to concentrated methyl-salicylate  
391 (ccMS) (Fig. 5C). Our results on identical cytoprotective responses shared by ccBA and ccMS  
392 (Fig. 5) suggest that the responses stimulated by ccBA preconditioning also eliminate the toxic  
393 agent and repair damage during ccMS exposure. Indeed, high doses of methyl-salicylate cause  
394 heavy toxicity in mammals (54). Thus, the preservation/restoration of tissue integrity by toxin-  
395 specific cytoprotective responses suppresses aversion. Consistent with this idea, ccDA  
396 treatment resulted in sustained hypermotility after ccDA removal and increased ccDA aversion  
397 (Fig. S2A and Fig. 2C). Furthermore, ccDA did not appear to activate considerable molecular  
398 defenses (Fig. 3) and neither SKN-1 manipulations (Fig. 4D) nor the systematic induction of  
399 cellular defenses by ccBA preconditioning (Fig. 5D) affected ccDA aversion. These results also  
400 exclude the unlikely possibility that induction of systemic cytoprotective responses *per se*  
401 inhibits aversive behavior. Hence, in the absence of adequate molecular defenses, the  
402 disturbance of cellular homeostasis may represent a danger signal which induces aversion.

403 The mechanisms by which toxin-induced disturbances in cellular homeostasis elicits  
404 behavioral aversion are yet unclear, but the modulation of aversion by somatic RNAi  
405 manipulations (Fig. 4) indicates an endocrine response. The stress-activated JNK and p38 MAP  
406 kinases are conserved signal transducers of cell stress including xenobiotic, oxidative, proteo-,  
407 genotoxic and pathogen stresses (55). Indeed, both the JNK-1 ortholog KGB-1 (56) and the p38  
408 ortholog PMK-1 (57, 58) were shown to monitor homeostasis and transmit signals to induce  
409 aversion in response to toxicity and infection. Further, yet unidentified signals emerge from the  
410 bloated intestine in response to infection (27), the major inner barrier and site of immunity and  
411 detoxification. Both DAF-16 and SKN-1 positive nuclei appear to be located around the gut  
412 lumen in our experiments (Fig. 3). The apparent impermeability of the cuticle to chemicals (59)  
413 and the predominant localization of SKN-1 and DAF-16 isoforms in the intestine suggest that  
414 signals evoked by odor toxicity are also likely to emanate primarily from the intestine. Neuronal

415 events might involve the NPR neuropeptide receptor and serotonin signaling pathways, which  
416 were shown to be required for aversive behavior and aversive olfactory learning against  
417 pathogens, toxins and for methyl-salicylate (27, 56, 60–64). However, other, yet, unidentified  
418 pathways might also be involved in the elicitation of the behavioral responses. We note that  
419 worms exposed to ccBA stayed at the edge of the food lawn but deserted at higher  
420 concentrations (see e.g. the 8% ccBA and above in Fig. 1C), similarly to the observations made  
421 using the repellent 2-nonanone (65), suggesting the multisensory integration of attractive and  
422 aversive impulses for decision making. Taken together, the elucidation of the mechanisms of  
423 cell stress-elicited behavioral decisions is an intriguing subject of future research.

424 Our findings that after a single stress exposure, characteristic stress-related behavioral  
425 responses are retrieved by the associated olfactory cues (Fig. 6) are indicative of associative  
426 learning. Similar phenomena, where somatic/cellular stress regulates learned aversion are the  
427 compromise in vital functions by toxins or RNAi targeting essential cellular processes and the  
428 intestinal bloating caused by pathogen bacteria (56, 66). Although the prevalence of new  
429 behaviors decreases with time, repeated stress exposures not only maintain (food leaving on  
430 diluted DA after ccDA massed training) but also enhance (odor choice after ccBA massed  
431 training) the respective behavioral choices (Fig. 7D, E). These findings are consistent with  
432 forgetting and intermediate term associative memory formation by reinforcement of the  
433 experience (42, 67). The elicitation of opposing behaviors by DA and BA olfactory cues after  
434 preconditioning demonstrates that the absence or presence of adequate cytoprotective responses  
435 at the time of stresses is a critical regulator of future behavioral decisions to anticipated stress  
436 (Fig. 8). The internal experience of disrupted tissue homeostasis by ccDA in the absence of  
437 cytoprotection is integrated into an associative memory of danger, which reverses the naturally  
438 attractive valence of DA and upon retrieval gives rise to avoidant behavior. Efficient  
439 cytoprotection in response to ccBA restores homeostasis and forms a memory of protection,

440 which upon retrieval elicits a tolerant behavior. Besides, the increased preference of DA over  
441 BA after ccBA preconditioning (Fig. 6G and 7E) suggests that the natural valence of BA is  
442 integrated with the cost to maintain it, probably through the associated experience of toxic  
443 stress. Such representation allows individuals to consider whether investment of resources for  
444 self-protection are needed or not to obtain food. Thus, although the BA-associated memory of  
445 somatic resilience creates a flexible choice depending on the local context of alternative food  
446 odor, whereas the DA-associated memory of danger gives rise to a stereotypic aversion, both  
447 behavioral decisions depend on the respective neural contexts of prior experiences (Fig. 8).

448 An evolutionarily conserved adaptive response to stress is the “fight-or-flight”  
449 response, originally coined for the neuroendocrine system (3, 68). Together with recent studies  
450 we here show the co-occurrence of behavioral “flight” responses with molecular stress and  
451 immune “fight” responses combating stress (27, 28, 56). Moreover, our studies reveal a  
452 regulatory link between intracellular cytoprotective responses and behavior suggesting a  
453 coordinated action of the fight and the flight responses to preserve organismal integrity. Beyond  
454 ensuring physical survival, the maintenance of cellular homeostasis by stress responses equips  
455 nematodes with behavioral tolerance to stay in or to approach real and anticipated stressful  
456 locations. Further, temporary avoidance in stresses that overwhelm molecular defenses allows  
457 the restoration of physiological integrity and the strengthening of cytoprotective mechanisms.  
458 Moreover, genetically weakened or absent molecular defenses narrow fitness by reinforcing  
459 avoidant behavior. Our work implies that memories of past stresses accompanied by insufficient  
460 cellular defenses may condition to avoidance. Avoidant behaviors are characteristic to various  
461 human mental disorders, such as phobias, panic attacks, complex posttraumatic stress disorder  
462 and eating disorders. These diseases are accompanied by intense physical sensations of stress  
463 and overwhelming fear and emotions to jettison or to avoid perceived danger, which happen in  
464 response to specific or unidentified sensory cues (11, 69). The foundations of stress and

465 detoxification responses and learning are conserved between nematodes and humans. Thus, it  
466 might be conceivable that unconscious memories of prior stressful somatic experiences govern  
467 emotions and behaviors in response to sensory cues.

## 468 **Conclusions**

469 This study shows how organisms ensure optimal self-protection during environmental  
470 stress by coordinating physiological and neurobehavioral defenses. Specifically, our findings  
471 reveal a critical role of somatic defenses in regulating behavioral avoidance and associative  
472 learning *via* the activation of conserved cellular stress responses. The mechanism depicted here  
473 enables animals to anticipate adverse conditions by retrieving stress memories and tailor their  
474 behavioral decisions depending on their past physiological response to the stressor. Whether  
475 such cellular memories might shape human behavior is subject of future studies.

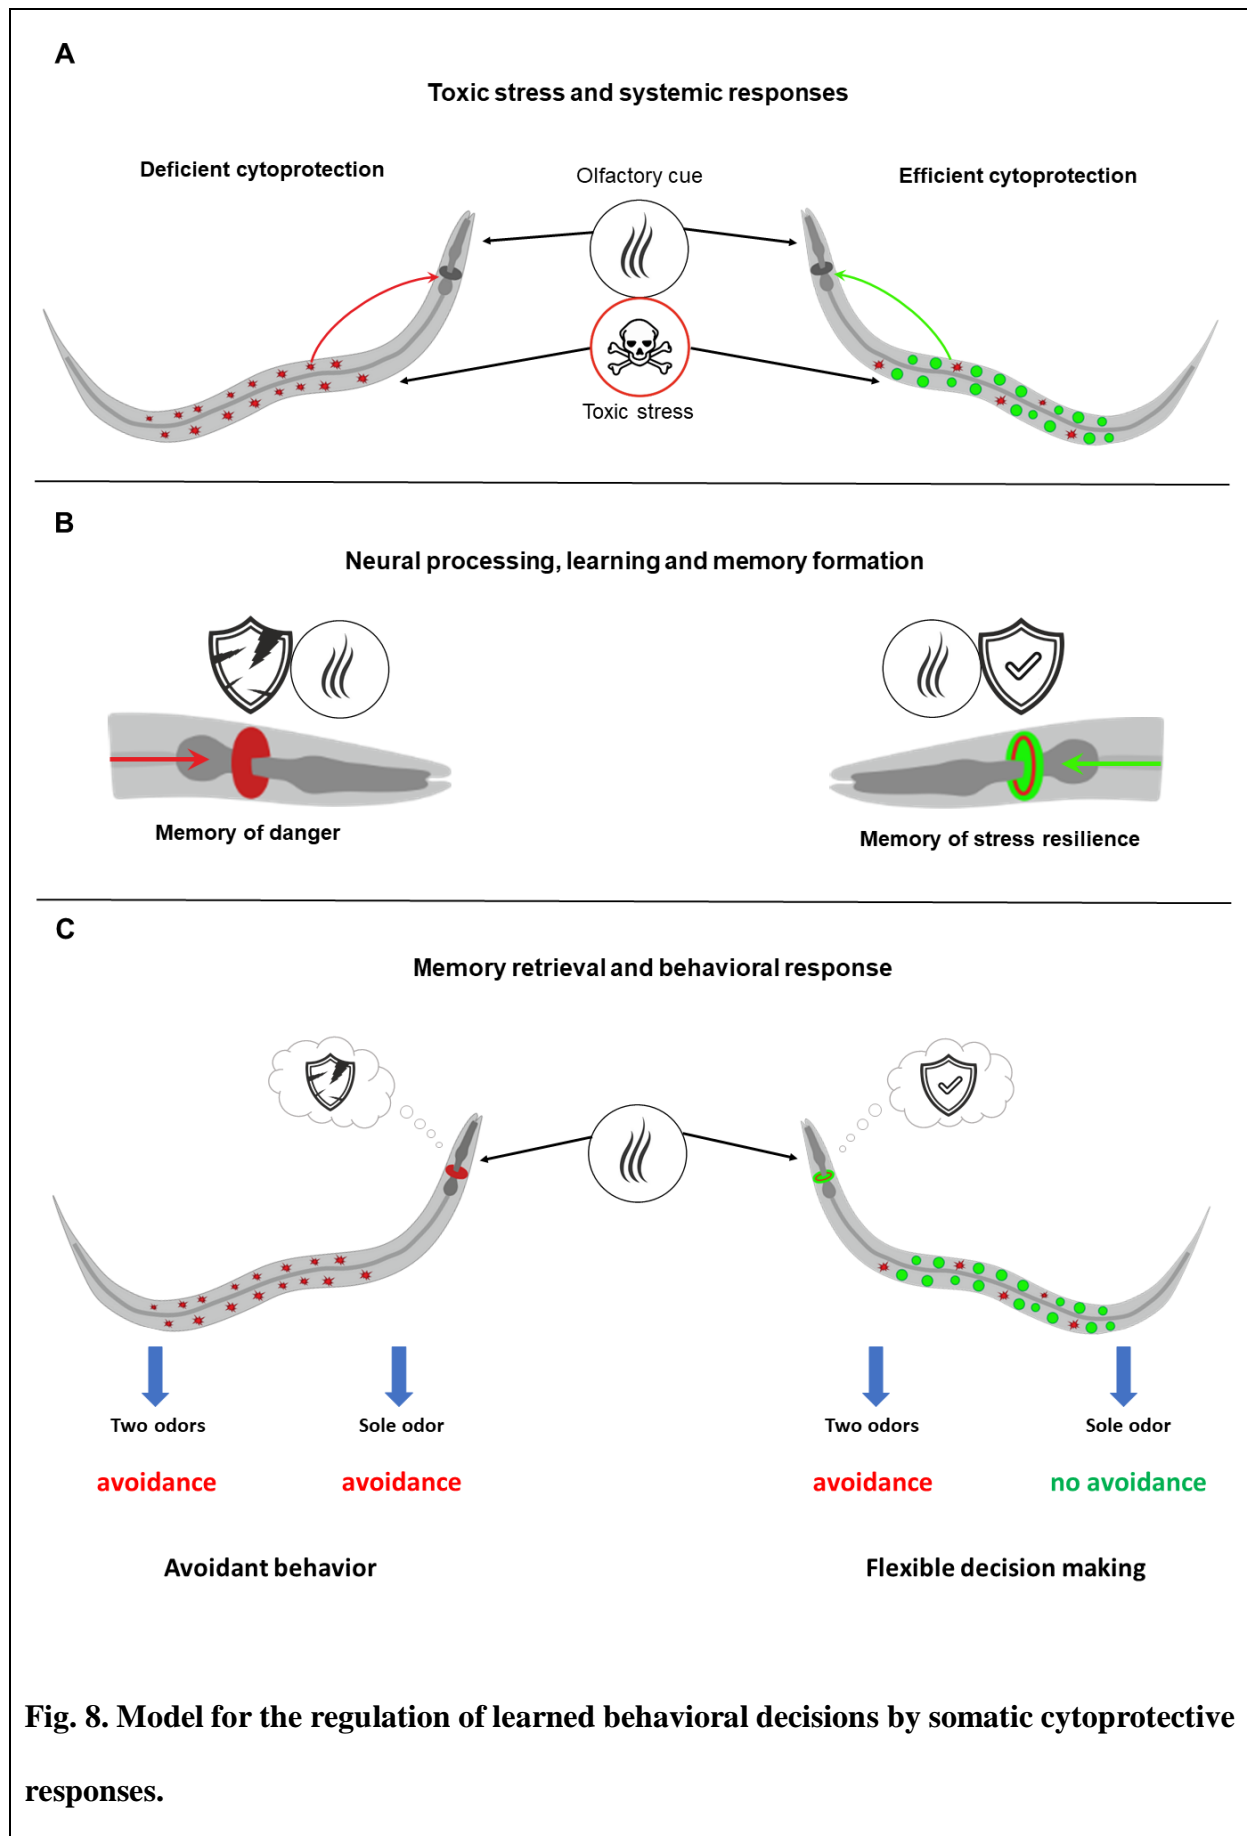

479 (A) Toxic stress-induced disturbance of cellular homeostasis (red symbols) prevails in the  
480 absence of adequate cytoprotection (left) and emits danger signals (red arrow) towards the  
481 nervous system (dark grey nerve ring in the head). Stress-specific cytoprotective responses  
482 (right) restore cellular homeostasis (green symbols) and suppress danger signals (green  
483 arrow).

484 (B) Simultaneously, signal processing in the nervous system generates an internal experience  
485 of danger (damaged shield) or stress-and-protection (intact shield). Integration with the co-  
486 occurring olfactory cues forms either a danger-based (red nerve ring) or stress-resilient  
487 (red-green nerve ring) associative memory.

488 (C) Memory retrieval by the respective olfactory cues evokes either a stereotypical avoidant  
489 behavior or a flexible behavioral decision depending on the external context, such as the  
490 absence or presence of another food-indicative odor besides the stress-associated olfactory  
491 cue.

492

## 493 **Methods**

### 494 **Materials**

495 The reagents benzaldehyde, diacetyl and methyl-salicylate were obtained from Sigma Aldrich.  
496 ccBA and ccDA abbreviate undiluted (concentrated) benzaldehyde and diacetyl, respectively.  
497 All other chemicals were obtained from Sigma or Fluka, if not otherwise mentioned.

### 498 ***C. elegans* strains and maintenance**

499 All strains used were provided by the Caenorhabditis Genetics Center: N2 (Bristol) wild type;  
500 TJ356 [daf-16p::daf-16a/b::GFP + rol-6(su1006)]; LD001 {Is007 [skn-1::gfp]}; TJ375 [hsp-  
501 16.2p::GFP]; CF1038 [daf-16(mgDf50)]; CY573 [bvls5(cyp-35B1p::GFP + gcy-7p::GFP)];

502 MJCU017 {kIs17[gst-4::gfp, pDP#MM016B]X}; LD1171 {Is003 [gcs-1::gfp]}; SJ4005 [hsp-  
503 4::GFP]; CF1553 {muIs84[pAD76(sod-3::GFP)]};. Strains were grown and maintained as  
504 previously described (70). Animals were synchronized by allowing adults to lay eggs for 4  
505 hours. All experiments were performed using day 1 adults, if not otherwise indicated.

### 506 **Odor preconditioning and massed training**

507 Preconditioning treatments were performed using the hanging drop method to prevent direct  
508 contact of concentrated volatiles with worms in the presence of bacterial food source to prevent  
509 the associated experience of starvation. More precisely, 1  $\mu$ l and 4  $\mu$ l drop of concentrated  
510 benzaldehyde (ccBA) or diacetyl (ccDA), respectively, was placed on the lid of 6 cm NGM  
511 plates seeded with OP50, containing a synchronous population of 200-300 young adults. The  
512 plate was sealed with parafilm to maintain a relatively constant dose of volatile. If not otherwise  
513 stated, preconditioning time was three hours. Massed training protocol was designed as  
514 described (41, 42) employing four sequential one-hour exposures to hanging drops of 2  $\mu$ l  
515 ccBA, 4  $\mu$ l ccDA or vehicle with intermittent washes in M9 buffer.

### 516 **Acute toxicity and thermotolerance measurements**

517 Toxicity and thermotolerance assays were carried out at 20°C, and at 35°C, respectively, by  
518 using approximately 25-40 worms per plate in three replicates in 3cm NGM plates in case of  
519 toxicity, and 6cm NGM plates in case of thermotolerance. Both toxicity and thermotolerance  
520 were measured by counting paralyzed worms using „head lifting” behavior of moveless animals  
521 (71). If an apparently paralyzed worm was not able to display at least “head lifting” movements  
522 following gentle fall of assay plate into experimental surface, it was counted as „paralyzed”.  
523 Paralysis index was calculated as the average of  $N_{\text{paralyzed}}/N_{\text{total}}$  at each time point. Animals that  
524 crawled off the agar surface were censored.

525 **Chemotaxis assays**

526 Chemotaxis experiments were carried out as previously described (15) and carried out earlier  
527 by our lab (72), with modifications. Briefly, synchronous population of young adults were  
528 washed twice in M9 buffer, then 80-100 worms were placed in the middle of a 10 cm CTX  
529 assay plate containing the odors without anesthetics in order to monitor the actual decisions at  
530 indicated time points. In kinetic chemotaxis, plates were streaked at each centimetre to measure  
531 the weighted distribution of worms at indicated time points. The Weighted Chemotaxis Index  
532 (WCI) were calculated as previously described (29).

533 **Food avoidance assay**

534 Bacterial lawn-avoidance experiments were performed as previously conceived (73), with  
535 modifications. Briefly, 50-80 synchronous day-1 adults were washed twice with M9 buffer and  
536 dropped onto the OP50 lawn in the middle of 6 cm NGM plates. Worms were allowed to settle  
537 for 30 minutes, unless otherwise indicated. A drop of given odor were placed on a piece of  
538 parafilm in the middle of the OP50 lawn. Animals on or off the lawn were counted at each  
539 indicated time point. Worms incapable to move or crawled off the agar surface were censored.  
540 Food-leaving index was calculated as the average of  $N_{\text{off}}/N_{\text{total}}$  taken from three technical  
541 replicates.

542 **Motility assay**

543 Motility was characterized as described (74) and performed earlier (72) by counting body bends  
544 for 1 minute using 10-15 animals in each condition. After measuring baseline motility on an  
545 OP50-seeded NGM agar plate, a toxic dose of odor hanging drop was placed on the lid and  
546 motility was measured at the indicated time points.

547 **RNA interference**



548 RNAi strains were obtained from Source Bioscience (Nottingham, UK). RNAi treatments were  
549 performed as previously described (75). RNAi feeding clones were grown overnight in LB  
550 medium containing 100 µg/ml ampicillin. Worms were grown on plates containing 1 mM IPTG,  
551 50 µg/ml ampicillin and 6.25 µg/ml tetracyclin and seeded with *E. coli* HT115 strains harboring  
552 the L4440 empty vector (EV) control and specific RNAi vectors, respectively, from hatching.

### 553 **Fluorescence microscopy**

554 Analysis and quantification of fluorescence was carried out as previously described (24), with  
555 modifications. After treatments, at least 20 worms per condition were picked individually and  
556 immobilized by 20 mM NaN<sub>3</sub> washed in M9 buffer onto a 2% agarose pad. Microscopic  
557 examination was carried out on a NIKON Eclipse E400 type fluorescence microscope linked  
558 to a Diagnostic Instruments SPOT 500 camera in case of TJ356, TJ375, CY573, MJCU017,  
559 LD1171, SJ4005, CF1553 strains; and OLYMPUS CKX53 Fluorescence microscope,  
560 OLYMPUS DP74 Cooled color camera in case of LD001 strain, using green fluorescent filters.  
561 Images are representatives of at least three independent experiments. Fluorescence intensity  
562 measurements were quantified with ImageJ. Visualization of *skn-1::GFP* nuclear punctae were  
563 carried out by OLYMPUS CellSens v2.3 Imaging software.

### 564 **Odor preference assay**

565 Odor preference was carried out in standard CTX plates. 80-100 naive and preconditioned  
566 young adults were washed off twice in M9 buffer and dropped into the middle of the assay  
567 plate. Odors were placed into two sides of the assay plate and worms were allowed to migrate  
568 for 50 minutes. Data are expressed as % of animals migrated into a 1 cm drawn circle around  
569 the respective odors as well as % of animals remained out of circles.

### 570 **Statistical analysis**

571 Kaplan–Meier log-rank tests using the program IBM SPSS Statistics were carried out to  
572 evaluate toxicity assays. Food avoidance and chemotaxis assays were examined by one-way  
573 ANOVA with Fisher’s LSD post-hoc test. Odor preference assays were analyzed by two-way  
574 ANOVA with Fisher’s LSD post-hoc test after evaluation of normal distribution significance  
575 by Shapiro-Wilk test. Significance in fluorescence intensity were calculated by unpaired  
576 Student’s t-test following evaluation of normal distribution significance by Kolmogorov-  
577 Smirnov test and Shapiro-Wilk test. One-way ANOVA with Fisher’s LSD post-hoc tests,  
578 Shapiro-Wilk and Kolmogorov-Smirnov tests, and unpaired Student’s t-test were carried out  
579 using IBM SPSS Statistics, while two-way ANOVA with Fisher’s LSD post-hoc tests were  
580 performed with STATISTICA. Data were expressed as mean  $\pm$  standard error of the mean  
581 (SEM) Statistical levels of significance are shown in each Fig. as follows: \* $p < 0.05$ ; \*\* $p <$   
582  $0.01$ ; \*\*\* $p < 0.001$ .

## 583 **References**

- 584 1. R. Bijlsma, V. Loeschcke, in *Journal of Evolutionary Biology* (2005), vol. 18, pp. 744–  
585 749.
- 586 2. D. Kültz, Molecular and evolutionary basis of the cellular stress response. *Annu. Rev.*  
587 *Physiol.* **67**, 225–57 (2005).
- 588 3. H. Selye, The Evolution of the Stress Concept: The originator of the concept traces its  
589 development from the discovery in 1936 of the alarm reaction to modern therapeutic  
590 applications of syntoxic and catatoxic hormones. *Am. Sci.* **61**, 692–699 (1973).
- 591 4. C. J. Kenyon, The genetics of ageing. *Nature.* **464**, 504–512 (2010).
- 592 5. A. V Badyaev, Stress-induced variation in evolution: from behavioural plasticity to  
593 genetic assimilation. *Proc. R. Soc. B Biol. Sci.* **272**, 877–886 (2005).
- 594 6. D. V. Baldwin, Primitive mechanisms of trauma response: An evolutionary perspective

- 595 on trauma-related disorders. *Neurosci. Biobehav. Rev.* **37**, 1549–1566 (2013).
- 596 7. R. McCarty, Learning about stress: neural, endocrine and behavioral adaptations.  
597 *Stress.* **19**, 449–475 (2016).
- 598 8. E. L. Ardiel, C. H. Rankin, An elegant mind: learning and memory in *Caenorhabditis*  
599 *elegans*. *Learn. Mem.* **17**, 191–201 (2010).
- 600 9. H. C. Barrett, J. Broesch, Prepared social learning about dangerous animals in children.  
601 *Evol. Hum. Behav.* **33**, 499–508 (2012).
- 602 10. D. Puzzo, J. Fiorito, R. Purgatorio, W. Gulisano, A. Palmeri, O. Arancio, R. Nicholls,  
603 Molecular Mechanisms of Learning and Memory. *Genes, Environ. Alzheimer's Dis.*, 1–  
604 27 (2016).
- 605 11. R. Garcia, Neurobiology of fear and specific phobias. *Learn. Mem.* **24**, 462–471  
606 (2017).
- 607 12. M. Botvinick, T. Braver, Motivation and Cognitive Control: From Behavior to Neural  
608 Mechanism. *Annu. Rev. Psychol.* **66**, 83–113 (2015).
- 609 13. T. W. Robbins, B. J. Everitt, Neurobehavioural mechanisms of reward and motivation.  
610 *Curr. Opin. Neurobiol.* **6**, 228–236 (1996).
- 611 14. L. Cosmides, J. Tooby, Evolutionary Psychology: New Perspectives on Cognition and  
612 Motivation. *Annu. Rev. Psychol.* **64**, 201–229 (2013).
- 613 15. C. I. Bargmann, E. Hartwig, H. R. Horvitz, Odorant-selective genes and neurons  
614 mediate olfaction in *C. elegans*. *Cell.* **74**, 515–527 (1993).
- 615 16. C. Bargmann, Chemosensation in *C. elegans*. *WormBook*, 1–29 (2006).
- 616 17. O. Hobert, Behavioral plasticity in *C. elegans*: Paradigms, circuits, genes. *J. Neurobiol.*  
617 **54**, 203–223 (2003).
- 618 18. T. K. Blackwell, M. J. Steinbaugh, J. M. Hourihan, C. Y. Ewald, M. Isik, SKN-1/Nrf,  
619 stress responses, and aging in *Caenorhabditis elegans*. *Free Radic. Biol. Med.* **88**, 290–

- 620 301 (2015).
- 621 19. S. Ogg, S. Paradis, S. Gottlieb, G. I. Patterson, L. Lee, H. A. Tissenbaum, G. Ruvkun,  
622 The Fork head transcription factor DAF-16 transduces insulin-like metabolic and  
623 longevity signals in *C. elegans*. *Nature*. **389**, 994–999 (1997).
- 624 20. A. Zečić, B. P. Braeckman, DAF-16/FoxO in *Caenorhabditis elegans* and Its Role in  
625 Metabolic Remodeling. *Cells*. **9**, 109 (2020).
- 626 21. A.-L. Hsu, C. T. Murphy, C. Kenyon, Regulation of aging and age-related disease by  
627 DAF-16 and heat-shock factor. *Science*. **300**, 1142–5 (2003).
- 628 22. S.-K. Park, P. M. Tedesco, T. E. Johnson, Oxidative stress and longevity in  
629 *Caenorhabditis elegans* as mediated by SKN-1. *Aging Cell*. **8**, 258–269 (2009).
- 630 23. H. Inoue, N. Hisamoto, J. H. An, R. P. Oliveira, E. Nishida, T. K. Blackwell, K.  
631 Matsumoto, The *C. elegans* p38 MAPK pathway regulates nuclear localization of the  
632 transcription factor SKN-1 in oxidative stress response. *Genes Dev*. **19**, 2278–83  
633 (2005).
- 634 24. D. Papp, P. Csermely, C. Söti, A role for SKN-1/Nrf in pathogen resistance and  
635 immunosenescence in *Caenorhabditis elegans*. *PLoS Pathog*. **8**, e1002673 (2012).
- 636 25. E. J. Calabrese, K. A. Bachmann, A. J. Bailer, P. M. Bolger, J. Borak, L. Cai, N.  
637 Cedergreen, M. G. Cherian, C. C. Chiueh, T. W. Clarkson, R. R. Cook, D. M.  
638 Diamond, D. J. Doolittle, M. A. Dorato, S. O. Duke, L. Feinendegen, D. E. Gardner, R.  
639 W. Hart, K. L. Hastings, A. W. Hayes, G. R. Hoffmann, J. A. Ives, Z. Jaworowski, T.  
640 E. Johnson, W. B. Jonas, N. E. Kaminski, J. G. Keller, J. E. Klaunig, T. B. Knudsen,  
641 W. J. Kozumbo, T. Lettieri, S.-Z. Liu, A. Maisseu, K. I. Maynard, E. J. Masoro, R. O.  
642 McClellan, H. M. Mehendale, C. Mothersill, D. B. Newlin, H. N. Nigg, F. W. Oehme,  
643 R. F. Phalen, M. A. Philbert, S. I. S. Rattan, J. E. Riviere, J. Rodricks, R. M. Sapolsky,  
644 B. R. Scott, C. Seymour, D. A. Sinclair, J. Smith-Sonneborn, E. T. Snow, L. Spear, D.

- 645 E. Stevenson, Y. Thomas, M. Tubiana, G. M. Williams, M. P. Mattson, Biological  
646 stress response terminology: Integrating the concepts of adaptive response and  
647 preconditioning stress within a hormetic dose–response framework. *Toxicol. Appl.*  
648 *Pharmacol.* **222**, 122–128 (2007).
- 649 26. J. A. Melo, G. Ruvkun, Inactivation of Conserved *C. elegans* Genes Engages Pathogen-  
650 and Xenobiotic-Associated Defenses. *Cell.* **149**, 452–466 (2012).
- 651 27. J. Singh, A. Aballay, Microbial Colonization Activates an Immune Fight-and-Flight  
652 Response via Neuroendocrine Signaling. *Dev. Cell.* **49**, 89–99.e4 (2019).
- 653 28. E. Gecse, B. Gilányi, M. Csaba, G. Hajdú, C. Sóti, A cellular defense memory  
654 imprinted by early life toxic stress. *Sci. Rep.* **9**, 18935 (2019).
- 655 29. W. M. Nuttley, S. Harbinder, D. van der Kooy, Regulation of distinct attractive and  
656 aversive mechanisms mediating benzaldehyde chemotaxis in *Caenorhabditis elegans*.  
657 *Learn. Mem.* **8**, 170–81 (2001).
- 658 30. K. Yoshida, T. Hirotsu, T. Tagawa, S. Oda, T. Wakabayashi, Y. Iino, T. Ishihara,  
659 Odour concentration-dependent olfactory preference change in *C. elegans*. *Nat.*  
660 *Commun.* **3**, 739 (2012).
- 661 31. L. Avery, Y.-J. You, *C. elegans* feeding. *WormBook*, 1–23 (2012).
- 662 32. T. Tabatabaie, R. A. Floyd, Inactivation of Glutathione Peroxidase by Benzaldehyde.  
663 *Toxicol. Appl. Pharmacol.* **141**, 389–393 (1996).
- 664 33. A. Andersen, Final report on the safety assessment of benzaldehyde. *Int. J. Toxicol.* **25**  
665 **Suppl 1**, 11–27 (2006).
- 666 34. M. Somogyvári, E. Gecse, C. Sóti, DAF-21/Hsp90 is required for *C. elegans* longevity  
667 by ensuring DAF-16/FOXO isoform A function. *Sci. Rep.* **8**, 12048 (2018).
- 668 35. K. P. Choe, A. J. Przybysz, K. Strange, The WD40 repeat protein WDR-23 functions  
669 with the CUL4/DDB1 ubiquitin ligase to regulate nuclear abundance and activity of

- 670 SKN-1 in *Caenorhabditis elegans*. *Mol. Cell. Biol.* **29**, 2704–15 (2009).
- 671 36. W. M. Winston, C. Molodowitch, C. P. Hunter, Systemic RNAi in *C. elegans* requires  
672 the putative transmembrane protein SID-1. *Science*. **295**, 2456–9 (2002).
- 673 37. A. Galal, L. Walker, I. Khan, Induction of GST and Related Events by Dietary  
674 Phytochemicals: Sources, Chemistry, and Possible Contribution to Chemoprevention.  
675 *Curr. Top. Med. Chem.* **14**, 2802–2821 (2015).
- 676 38. W. P. Jorissen, P. A. A. van der Beek, The oxidation of benzaldehyde. *Recl. des Trav.*  
677 *Chim. des Pays-Bas.* **49**, 138–141 (2010).
- 678 39. M. Sankar, E. Nowicka, E. Carter, D. M. Murphy, D. W. Knight, D. Bethell, G. J.  
679 Hutchings, The benzaldehyde oxidation paradox explained by the interception of  
680 peroxy radical by benzyl alcohol. *Nat. Commun.* **5**, 3332 (2014).
- 681 40. S.-W. Park, E. Kaimoyo, D. Kumar, S. Mosher, D. F. Klessig, Methyl salicylate is a  
682 critical mobile signal for plant systemic acquired resistance. *Science*. **318**, 113–6  
683 (2007).
- 684 41. A. Kauffman, L. Parsons, G. Stein, A. Wills, R. Kaletsky, C. Murphy, *C. elegans*  
685 positive butanone learning, short-term, and long-term associative memory assays. *J.*  
686 *Vis. Exp.*, 1–10 (2011).
- 687 42. H. Amano, I. N. Maruyama, Aversive olfactory learning and associative long-term  
688 memory in *Caenorhabditis elegans*. *Learn. Mem.* **18**, 654–65 (2011).
- 689 43. E. R. Troemel, J. H. Chou, N. D. Dwyer, H. A. Colbert, C. I. Bargmann, Divergent  
690 seven transmembrane receptors are candidate chemosensory receptors in *C. elegans*.  
691 *Cell*. **83**, 207–218 (1995).
- 692 44. R. Aoki, T. Yagami, H. Sasakura, K. -i. Ogura, Y. Kajihara, M. Ibi, T. Miyamae, F.  
693 Nakamura, T. Asakura, Y. Kanai, Y. Misu, Y. Iino, M. Ezcurra, W. R. Schafer, I. Mori,  
694 Y. Goshima, A Seven-Transmembrane Receptor That Mediates Avoidance Response to

- 695 Dihydrocaffeic Acid, a Water-Soluble Repellent in *Caenorhabditis elegans*. *J.*  
696 *Neurosci.* **31**, 16603–16610 (2011).
- 697 45. W. M. Kluwe, C. A. Montgomery, H. D. Giles, J. D. Prejean, Encephalopathy in rats  
698 and nephropathy in rats and mice after subchronic oral exposure to benzaldehyde. *Food*  
699 *Chem. Toxicol.* **21**, 245–250 (1983).
- 700 46. J. M. McKim, P. K. Schmieder, G. J. Niemi, R. W. Carlson, T. R. Henry, Use of  
701 respiratory-cardiovascular responses of rainbow trout ( *Salmo gairdneri* ) in identifying  
702 acute toxicity syndromes in fish: Part 2. malathion, carbaryl, acrolein and  
703 benzaldehyde. *Environ. Toxicol. Chem.* **6**, 313–328 (1987).
- 704 47. D. M. Brass, S. M. Palmer, Models of toxicity of diacetyl and alternative diones.  
705 *Toxicology.* **388**, 15–20 (2017).
- 706 48. S. Clark, C. K. Winter, Diacetyl in Foods: A Review of Safety and Sensory  
707 Characteristics. *Compr. Rev. Food Sci. Food Saf.* **14**, 634–643 (2015).
- 708 49. T. Shibamoto, Diacetyl: Occurrence, Analysis, and Toxicity. *J. Agric. Food Chem.* **62**,  
709 4048–4053 (2014).
- 710 50. W. M. Nuttley, K. P. Atkinson-Leadbetter, D. Van Der Kooy, Serotonin mediates  
711 food-odor associative learning in the nematode *Caenorhabditiselegans*. *Proc. Natl.*  
712 *Acad. Sci. U. S. A.* **99**, 12449–54 (2002).
- 713 51. H. Sasakura, I. Mori, Behavioral plasticity, learning, and memory in *C. elegans*. *Curr.*  
714 *Opin. Neurobiol.* **23**, 92–99 (2013).
- 715 52. V. Singh, A. Aballay, Heat-shock transcription factor (HSF)-1 pathway required for  
716 *Caenorhabditis elegans* immunity. *Proc. Natl. Acad. Sci. U. S. A.* **103**, 13092–7 (2006).
- 717 53. J. M. A. Tullet, M. Hertweck, J. H. An, J. Baker, J. Y. Hwang, S. Liu, R. P. Oliveira,  
718 R. Baumeister, T. K. Blackwell, Direct Inhibition of the Longevity-Promoting Factor  
719 SKN-1 by Insulin-like Signaling in *C. elegans*. *Cell.* **132**, 1025–1038 (2008).

- 720 54. T. Greene, S. Rogers, A. Franzen, R. Gentry, A critical review of the literature to  
721 conduct a toxicity assessment for oral exposure to methyl salicylate. *Crit. Rev. Toxicol.*  
722 **47**, 98–120 (2017).
- 723 55. J. M. Kyriakis, J. Avruch, Mammalian MAPK Signal Transduction Pathways  
724 Activated by Stress and Inflammation: A 10-Year Update. *Physiol. Rev.* **92**, 689–737  
725 (2012).
- 726 56. J. A. Melo, G. Ruvkun, Inactivation of conserved *C. elegans* genes engages pathogen-  
727 and xenobiotic-associated defenses. *Cell*. **149**, 452–66 (2012).
- 728 57. D. H. Kim, R. Feinbaum, G. Alloing, F. E. Emerson, D. A. Garsin, H. Inoue, M.  
729 Tanaka-Hino, N. Hisamoto, K. Matsumoto, M.-W. Tan, F. M. Ausubel, A conserved  
730 p38 MAP kinase pathway in *Caenorhabditis elegans* innate immunity. *Science*. **297**,  
731 623–6 (2002).
- 732 58. K. Lee, E. Mylonakis, An Intestine-Derived Neuropeptide Controls Avoidance  
733 Behavior in *Caenorhabditis elegans*. *Cell Rep.* **20**, 2501–2512 (2017).
- 734 59. H. Xiong, C. Pears, A. Woollard, An enhanced *C. elegans* based platform for toxicity  
735 assessment. *Sci. Rep.* **7**, 9839 (2017).
- 736 60. A. M. Horspool, H. C. Chang, Neuron-specific regulation of superoxide dismutase  
737 amid pathogen-induced gut dysbiosis. *Redox Biol.* **17**, 377–385 (2018).
- 738 61. A. Livnat, Interaction-based evolution: how natural selection and nonrandom mutation  
739 work together. *Biol. Direct.* **8**, 24 (2013).
- 740 62. J. Luo, Z. Xu, Z. Tan, Z. Zhang, L. Ma, Neuropeptide receptors NPR-1 and NPR-2  
741 regulate *Caenorhabditis elegans* avoidance response to the plant stress hormone methyl  
742 salicylate. *Genetics*. **199**, 523–31 (2015).
- 743 63. Y. Zhang, H. Lu, C. I. Bargmann, Pathogenic bacteria induce aversive olfactory  
744 learning in *Caenorhabditis elegans*. *Nature*. **438**, 179–184 (2005).



- 745 64. R. Nakad, L. B. Snoek, W. Yang, S. Ellendt, F. Schneider, T. G. Mohr, L. Rösingh, A.  
746 C. Masche, P. C. Rosenstiel, K. Dierking, J. E. Kammenga, H. Schulenburg,  
747 Contrasting invertebrate immune defense behaviors caused by a single gene, the  
748 *Caenorhabditis elegans* neuropeptide receptor gene *npr-1*. *BMC Genomics*. **17**, 280  
749 (2016).
- 750 65. G. Harris, T. Wu, G. Linfield, M.-K. Choi, H. Liu, Y. Zhang, Molecular and cellular  
751 modulators for multisensory integration in *C. elegans*. *PLOS Genet.* **15**, e1007706  
752 (2019).
- 753 66. J. Singh, A. Aballay, Intestinal infection regulates behavior and learning via  
754 neuroendocrine signaling. *Elife*. **8** (2019), doi:10.7554/eLife.50033.
- 755 67. G. M. Stein, C. T. Murphy, *C. elegans* positive olfactory associative memory is a  
756 molecularly conserved behavioral paradigm. *Neurobiol. Learn. Mem.* **115**, 86–94  
757 (2014).
- 758 68. W. B. Cannon, *The wisdom of the body*, 2nd ed. (1939).
- 759 69. A. Pittig, M. Treanor, R. T. LeBeau, M. G. Craske, The role of associative fear and  
760 avoidance learning in anxiety disorders: Gaps and directions for future research.  
761 *Neurosci. Biobehav. Rev.* **88**, 117–140 (2018).
- 762 70. S. Brenner, The genetics of *Caenorhabditis elegans*. *Genetics*. **77**, 71–94 (1974).
- 763 71. N. A. CROLL, Components and patterns in the behaviour of the nematode  
764 *Caenorhabditis elegans*. *J. Zool.* **176**, 159–176 (2009).
- 765 72. M. D. Gyurkó, P. Csermely, C. Sőti, A. Steták, Distinct roles of the RasGAP family  
766 proteins in *C. elegans* associative learning and memory. *Sci. Rep.* **5**, 15084 (2015).
- 767 73. K. Milward, K. E. Busch, R. J. Murphy, M. de Bono, B. Olofsson, Neuronal and  
768 molecular substrates for optimal foraging in *Caenorhabditis elegans*. *Proc. Natl. Acad.*  
769 *Sci. U. S. A.* **108**, 20672–7 (2011).

- 770 74. E. R. Sawin, R. Ranganathan, H. R. Horvitz, *C. elegans* Locomotory Rate Is Modulated  
771 by the Environment through a Dopaminergic Pathway and by Experience through a  
772 Serotonergic Pathway. *Neuron*. **26**, 619–631 (2000).
- 773 75. L. Timmons, in *C. elegans* (Humana Press, New Jersey, 2006);  
774 <http://www.ncbi.nlm.nih.gov/pubmed/16988430>), vol. 351, pp. 119–126.

## 775 **Acknowledgements**

776 We thank the *Caenorhabditis* Genetics Center for *C. elegans* strains, Wormbase for collecting  
777 and providing data on *C. elegans*. We are grateful to Somogyvári Milán for technical and  
778 methodological help, and other members of the Stress Group for discussions. C.S. is thankful  
779 for the Merit Prize of the Semmelweis University.

## 780 **Funding**

781 This work was funded by grants from the Hungarian Science Foundation (OTKA K 116525),  
782 from the Semmelweis University (STIA\_18\_M/6800313263) and by the European  
783 Commission (GENiE, COST BM1408) to C.S.

784 The funders had no role in study design, data collection and interpretation, or the decision to  
785 submit the work for publication.

## 786 **Author information**

### 787 **Affiliations**

788 *Department of Medical Chemistry, Semmelweis University, Budapest, Hungary*

789 Gábor Hajdú, Eszter Gecse, István Taisz, István Móra & Csaba Söti

790 *Current address: MRC Laboratory of Molecular Biology, Neurobiology Division, Cambridge,*

791 *UK*

792 István Taisz

### 793 **Authors' Contributions**

794 CS conceived the study. GH and CS designed the experiments. GH, EG, IT and IM performed  
795 the experiments. GH, EG, IT, IM and CS analyzed the data. HG and CS wrote the manuscript  
796 with comments from IT. All authors read and approved the manuscript.

### 797 **Author ORCIDs**

798 Gábor Hajdú  <https://orcid.org/0000-0002-6936-0958>

799 Csaba Sóti  <https://orcid.org/0000-0002-5975-3352>

### 800 **Declarations**

#### 801 **Ethics approval and consent to participate**

802 Not applicable.

#### 803 **Consent for publication**

804 Not applicable.

#### 805 **Availability of data and materials**

806 The datasets used and/or analysed during the current study are available from the  
807 corresponding author on reasonable request.

#### 808 **Competing Interests**

809 The authors declare no competing interests.

810

811 **Supplementary Figures**

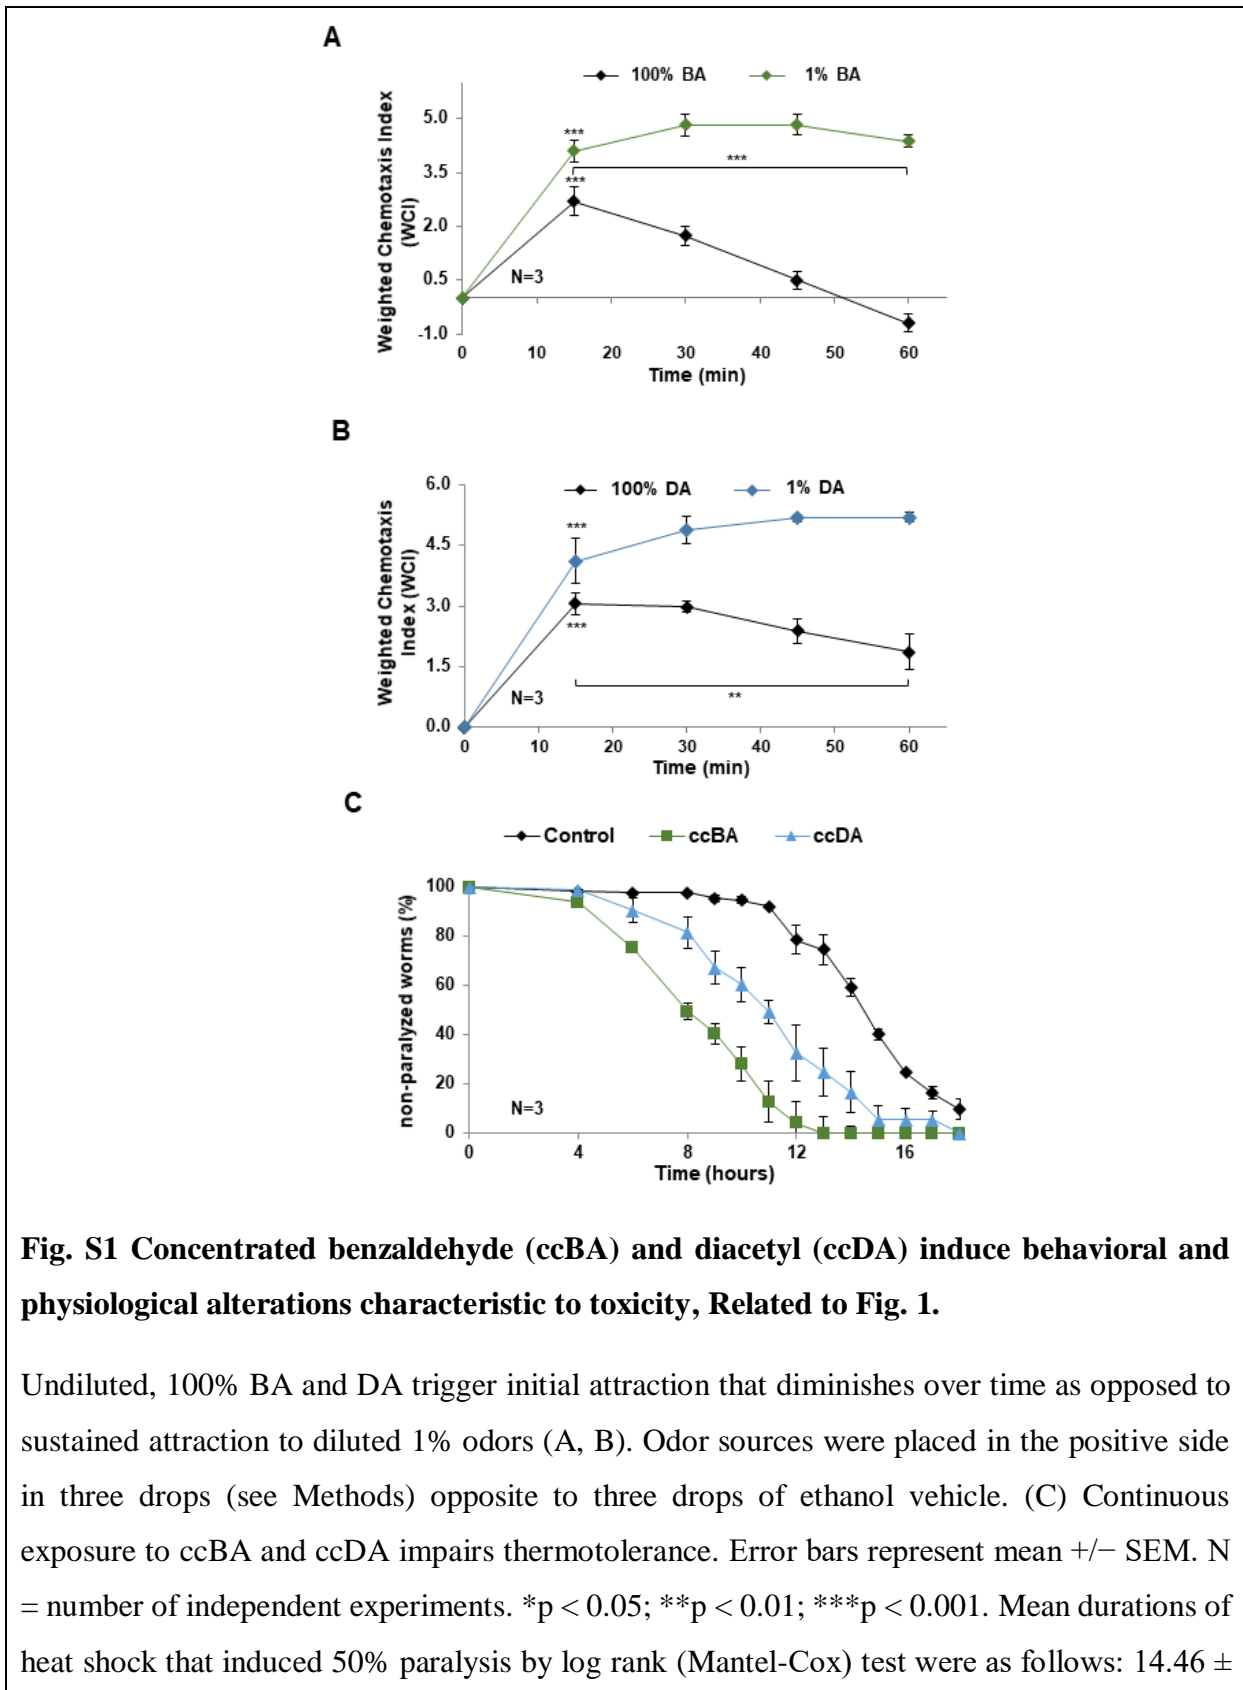

821 0.23 hours for vehicle treated control,  $10.74 \pm 0.42$  hours for ccBA exposed ( $p=0.0001$ )  
 822 compared to control),  $12.45 \pm 0.43$  hours for ccDA exposed ( $p=0.011$  compared to control).

823

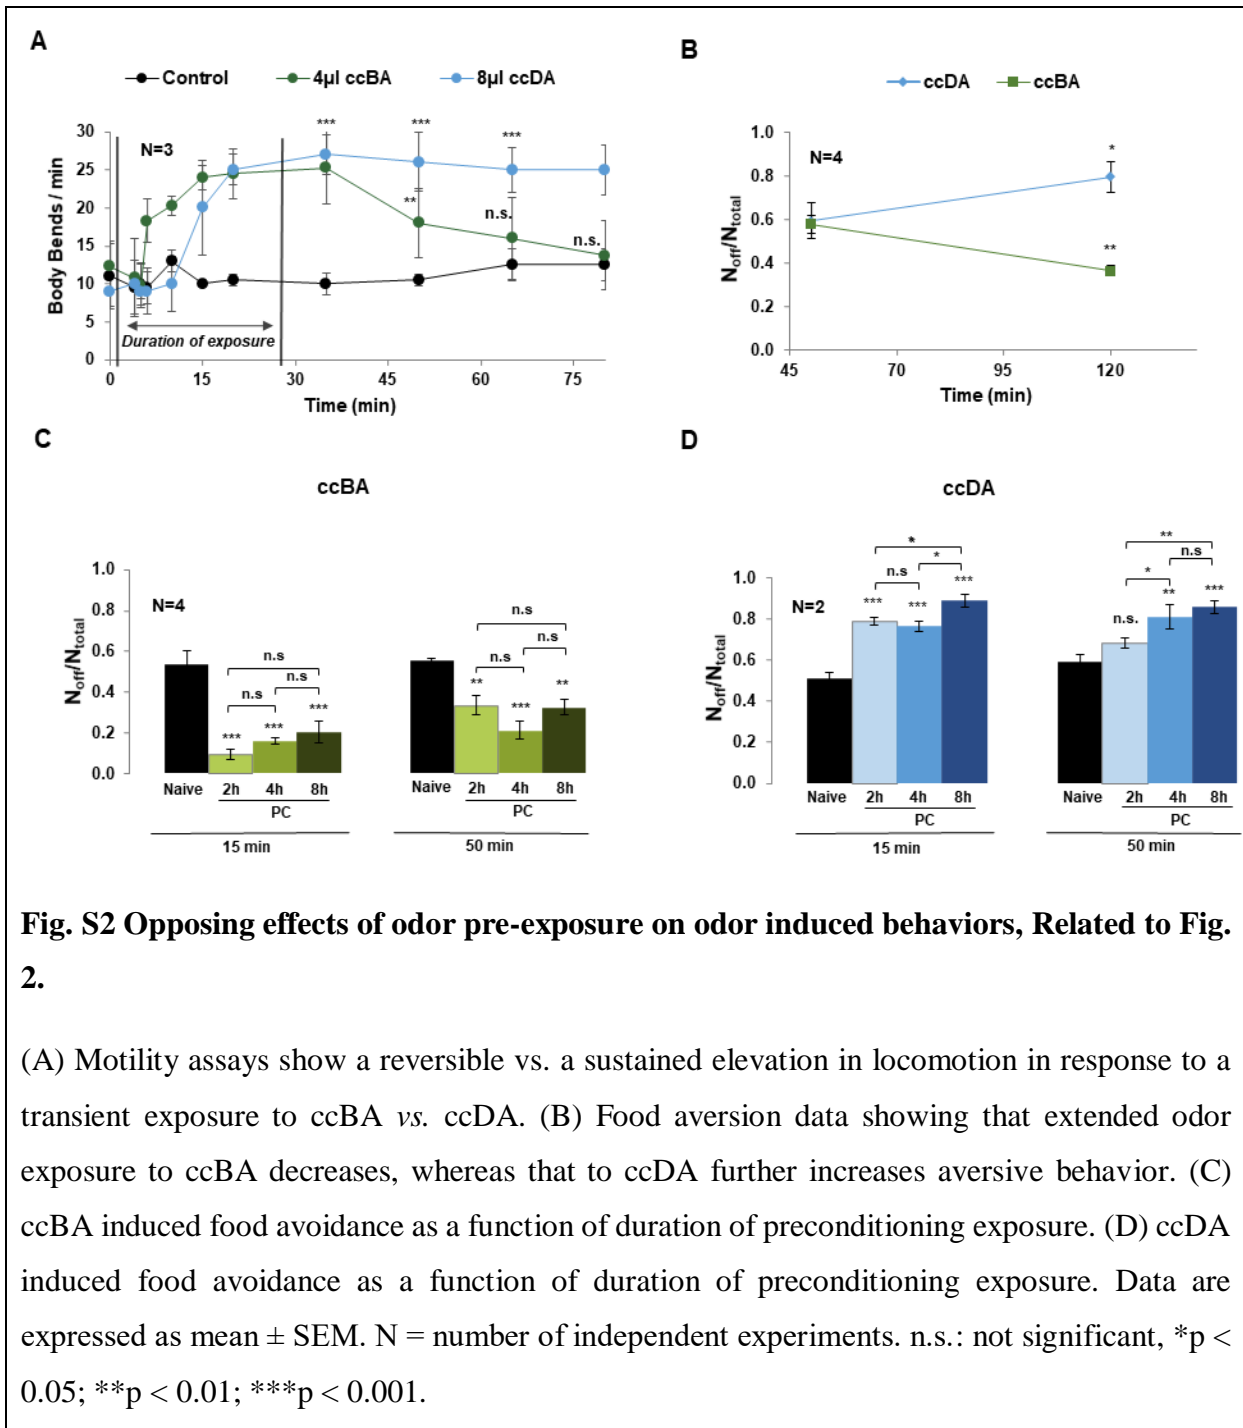

824

825 **Fig. S2 Opposing effects of odor pre-exposure on odor induced behaviors, Related to Fig.**  
 826 **2.**

827 (A) Motility assays show a reversible vs. a sustained elevation in locomotion in response to a  
 828 transient exposure to ccBA vs. ccDA. (B) Food aversion data showing that extended odor  
 829 exposure to ccBA decreases, whereas that to ccDA further increases aversive behavior. (C)  
 830 ccBA induced food avoidance as a function of duration of preconditioning exposure. (D) ccDA  
 831 induced food avoidance as a function of duration of preconditioning exposure. Data are  
 832 expressed as mean  $\pm$  SEM. N = number of independent experiments. n.s.: not significant, \* $p <$   
 833  $0.05$ ; \*\* $p < 0.01$ ; \*\*\* $p < 0.001$ .

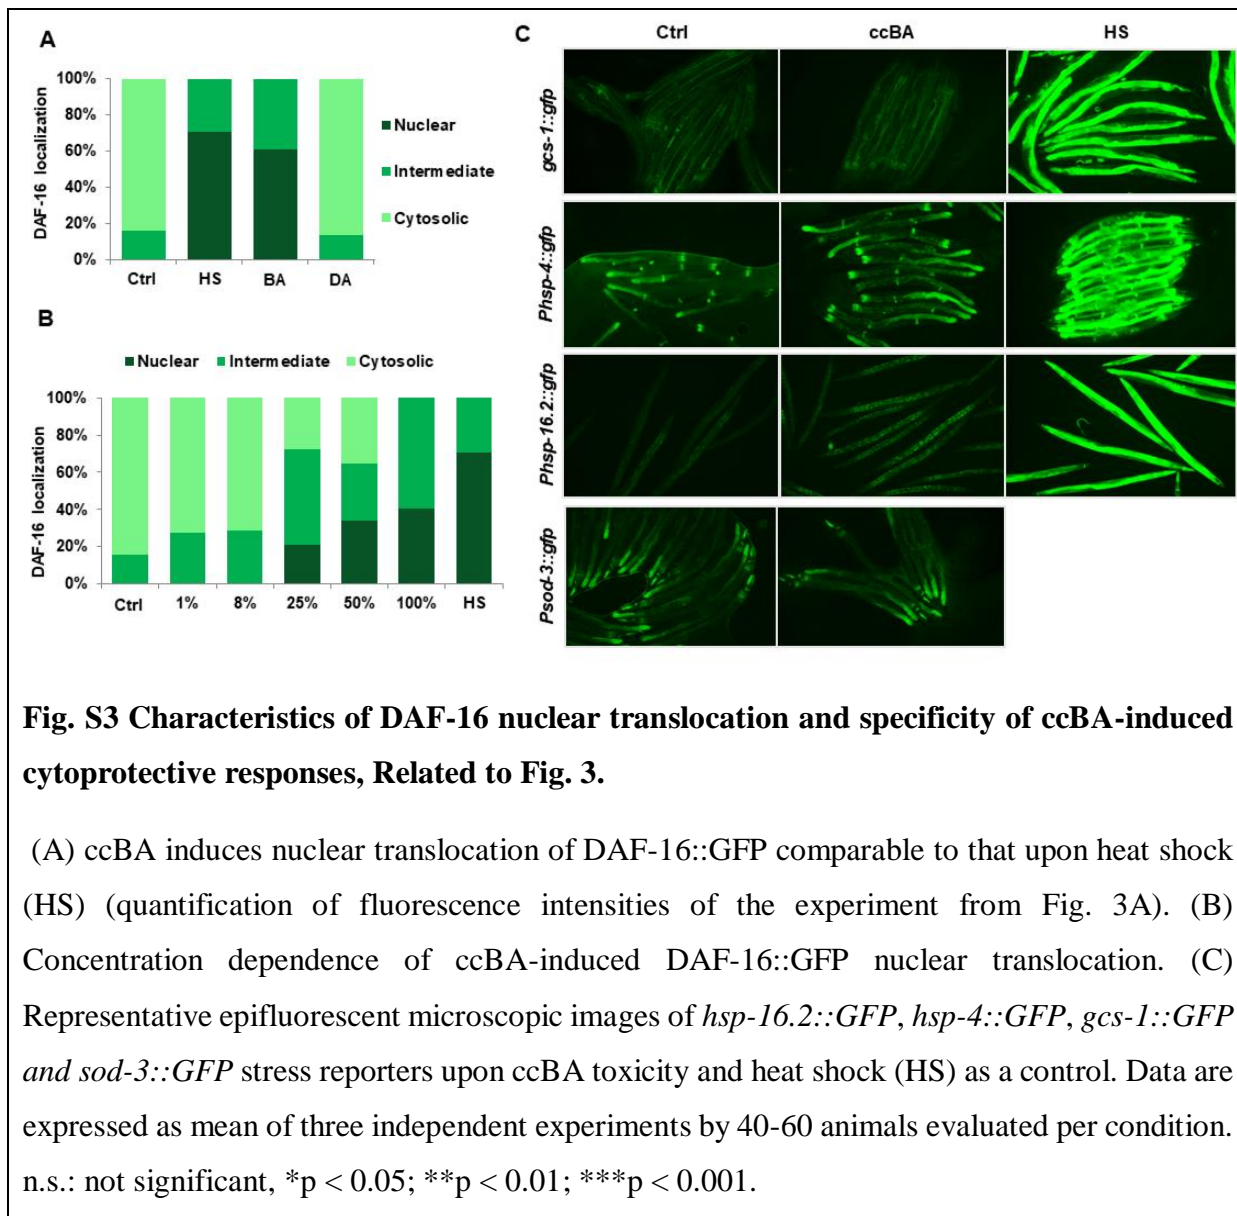

834

835 **Fig. S3 Characteristics of DAF-16 nuclear translocation and specificity of ccBA-induced**  
 836 **cytoprotective responses, Related to Fig. 3.**

837 (A) ccBA induces nuclear translocation of DAF-16::GFP comparable to that upon heat shock  
 838 (HS) (quantification of fluorescence intensities of the experiment from Fig. 3A). (B)  
 839 Concentration dependence of ccBA-induced DAF-16::GFP nuclear translocation. (C)  
 840 Representative epifluorescent microscopic images of *hsp-16.2::GFP*, *hsp-4::GFP*, *gcs-1::GFP*  
 841 and *sod-3::GFP* stress reporters upon ccBA toxicity and heat shock (HS) as a control. Data are  
 842 expressed as mean of three independent experiments by 40-60 animals evaluated per condition.  
 843 n.s.: not significant, \* $p < 0.05$ ; \*\* $p < 0.01$ ; \*\*\* $p < 0.001$ .

844

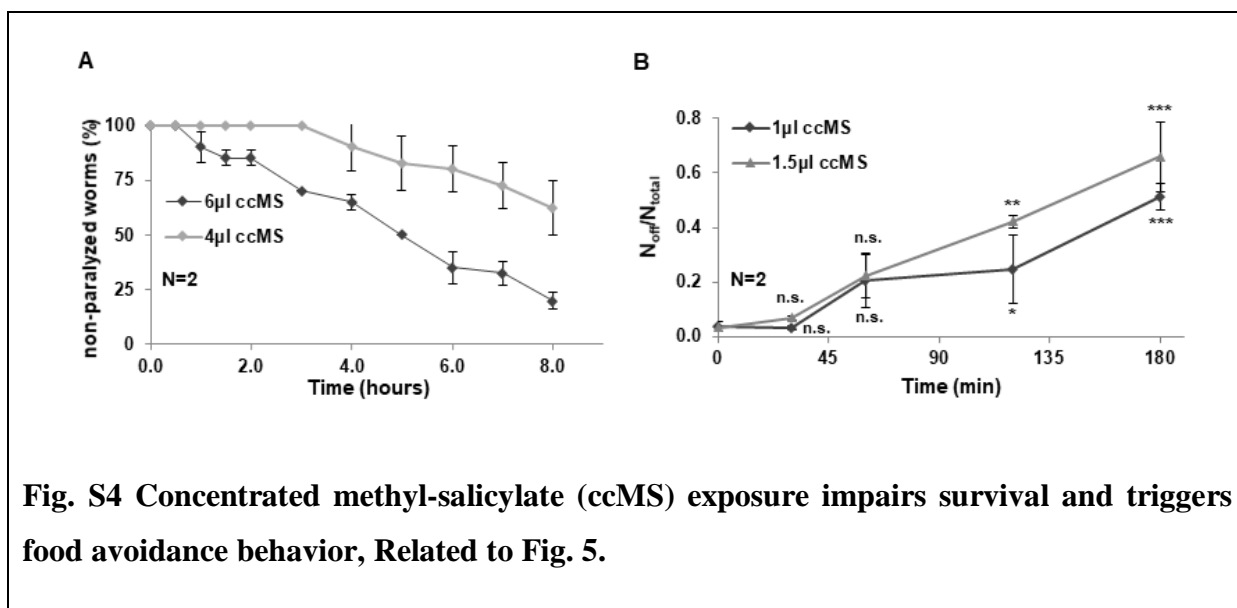

845

846 **Fig. S4 Concentrated methyl-salicylate (ccMS) exposure impairs survival and triggers**  
 847 **food avoidance behavior, Related to Fig. 5.**

848 (A) Survival curves of nematodes exposed to various doses of ccMS using a hanging drop assay.  
849 (B) Time-dependence of ccMS induced food avoidance behavior. Error bars represent mean  $\pm$   
850 SEM, N = number of independent experiments. \* $p < 0.05$ , \*\* $p < 0.01$ , \*\*\* $p < 0.001$ . Mean  
851 paralysis values by log rank (Mantel-Cox) test were as follows:  $6.65 \pm 0.32$  hours for 4  $\mu\text{l}$  ccMS,  
852  $4.72 \pm 0.42$  hours for 6  $\mu\text{l}$  ccMS,  $p=0.001$ .
